# Supplementary material for: Genomic Analysis of Stropharia rugosoannulata Reveals Its Nutritional Strategy and Application Potential in Bioremediation
Source: MDPI journal article supplement (doi:10.3390/jof8020162), 2022-02-06
Supplement: s1 [file s1]

## **Supplementary material**

**Manuscript title: Genomic analysis of *Stropharia rugosoannulata* reveals the nutritional strategy and application potential in bioremediation**

### **Information**

1. Supplementary Figures 1 to 9: page 2-17
2. Supplementary Tables 1 to 18: page 18-54

**Figure S1.**

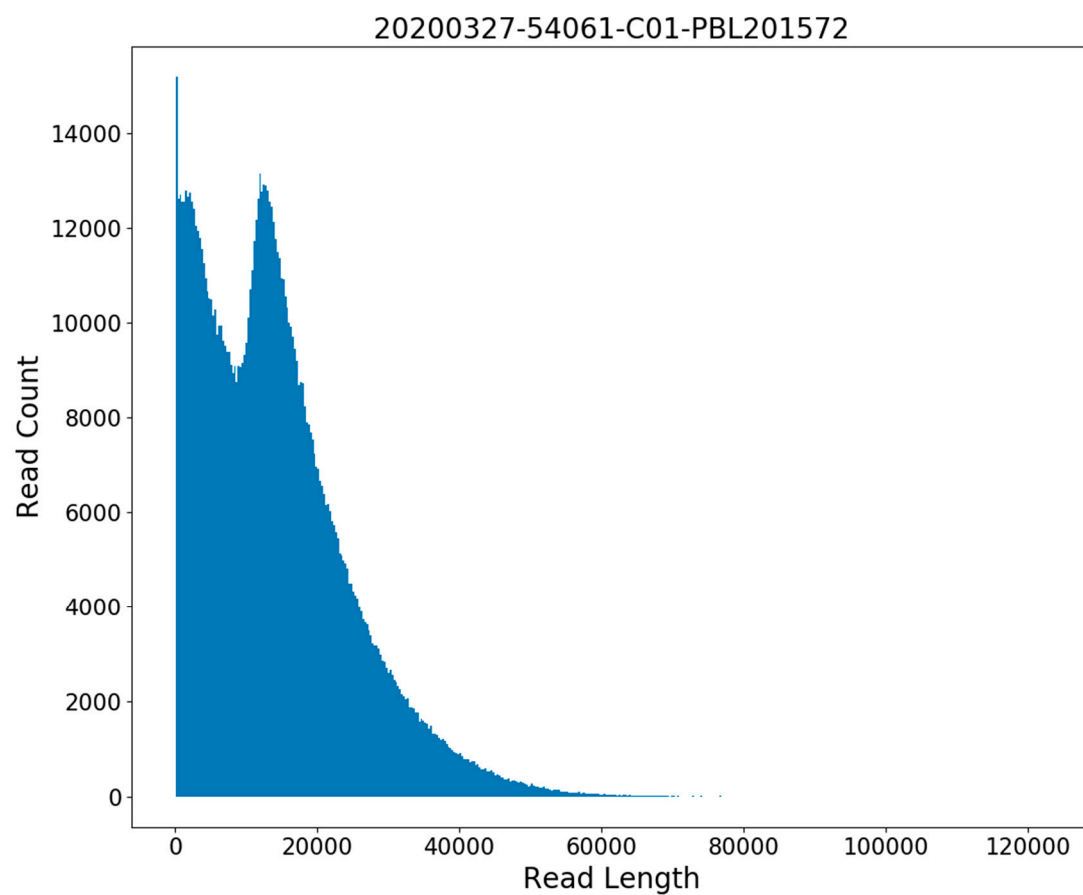

Figure S1. Statistical analysis for high-quality reads of the *Stropharia rugosoannulata* genome. Abscissa and vertical represent the Subreads length, number of subread at the specified length, respectively. There is a total of 14.55 G clean data, 1,023,677 reads with an average read length of 14.21kb and the longest of 122.80Kb.

Figure S2.

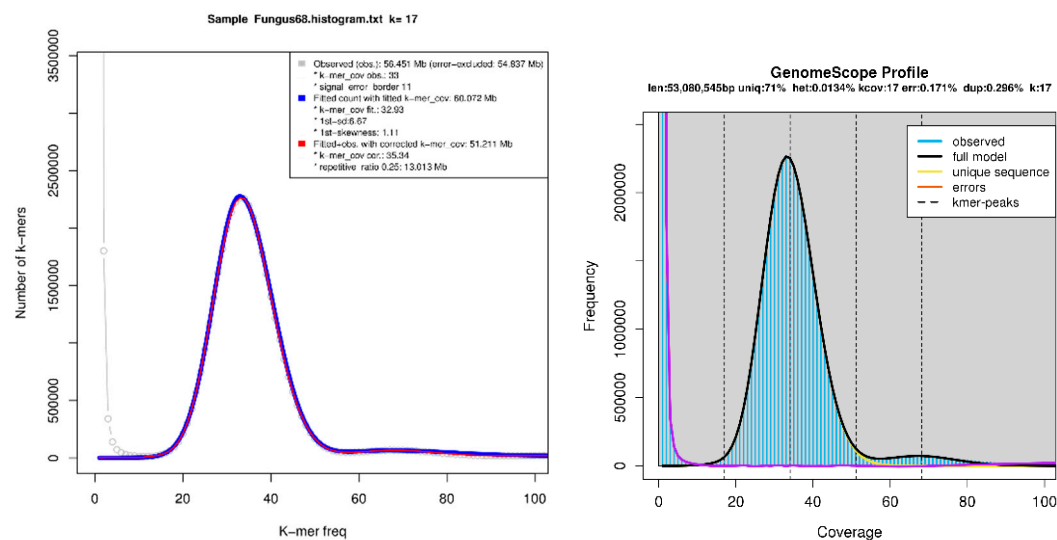

Figure S2. Heterozygosity analysis based on K-mer analysis

**Figure S3.**

**A**

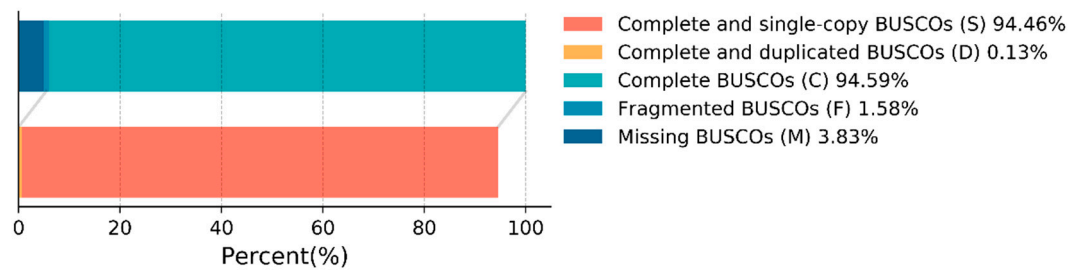

**B**

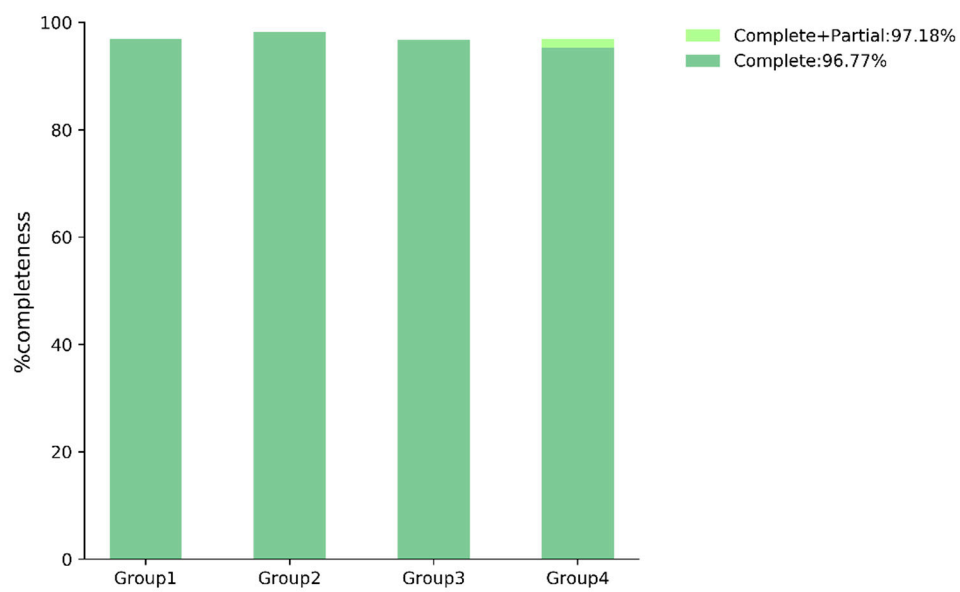

Figure S3. The completeness evaluation of the assembled genome

A BUSCO

B CEGMA

**Figure S4.**

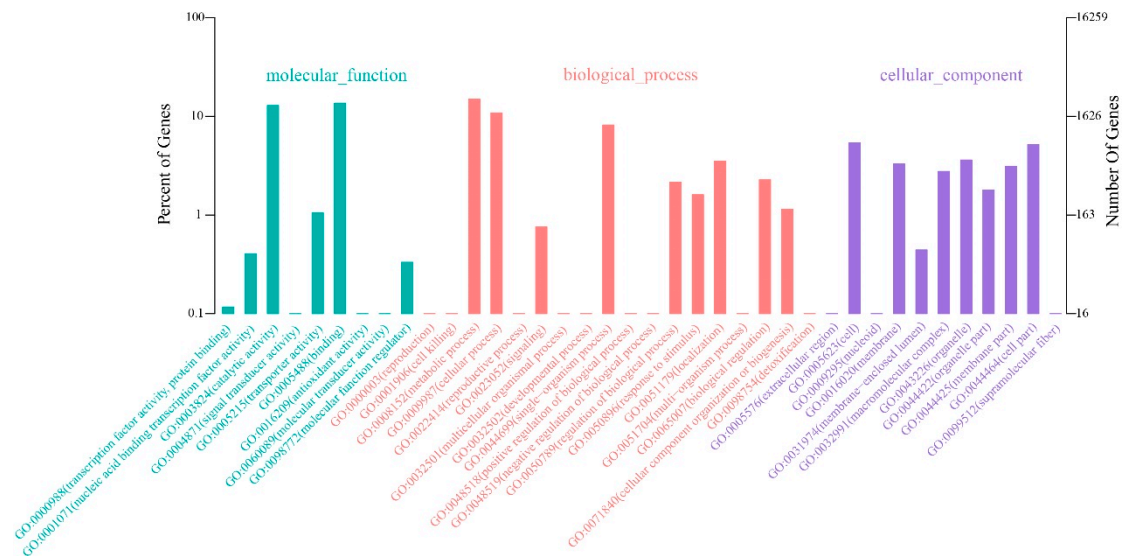

Figure S4. Go enrichment of predicted proteins in *Stropharia rogoasoannulata*

**Figure S5.**

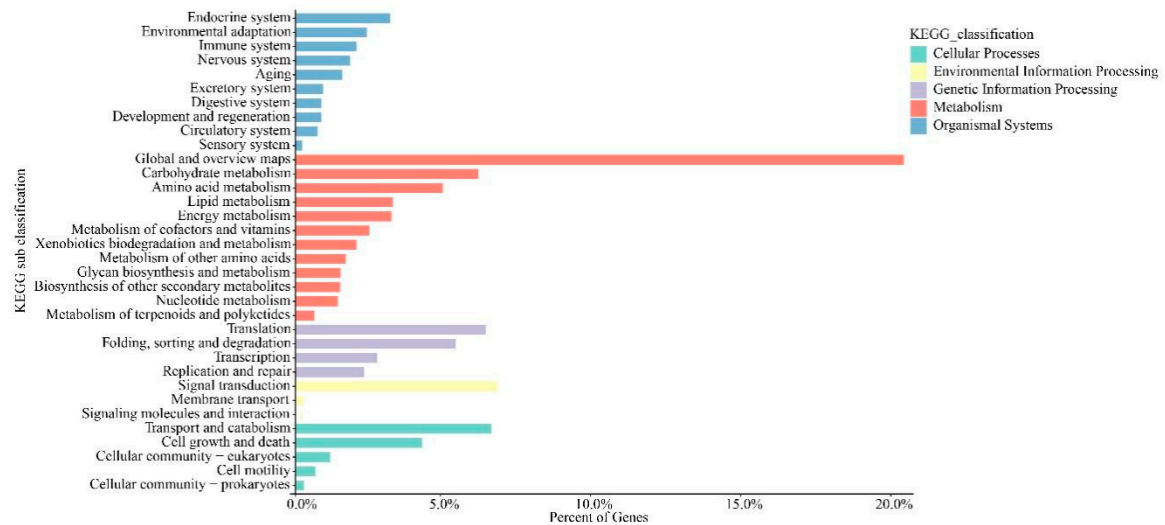

Figure S5. KEGG classification of predicted proteins in *Stropharia rogoannulata*

Figure S6.

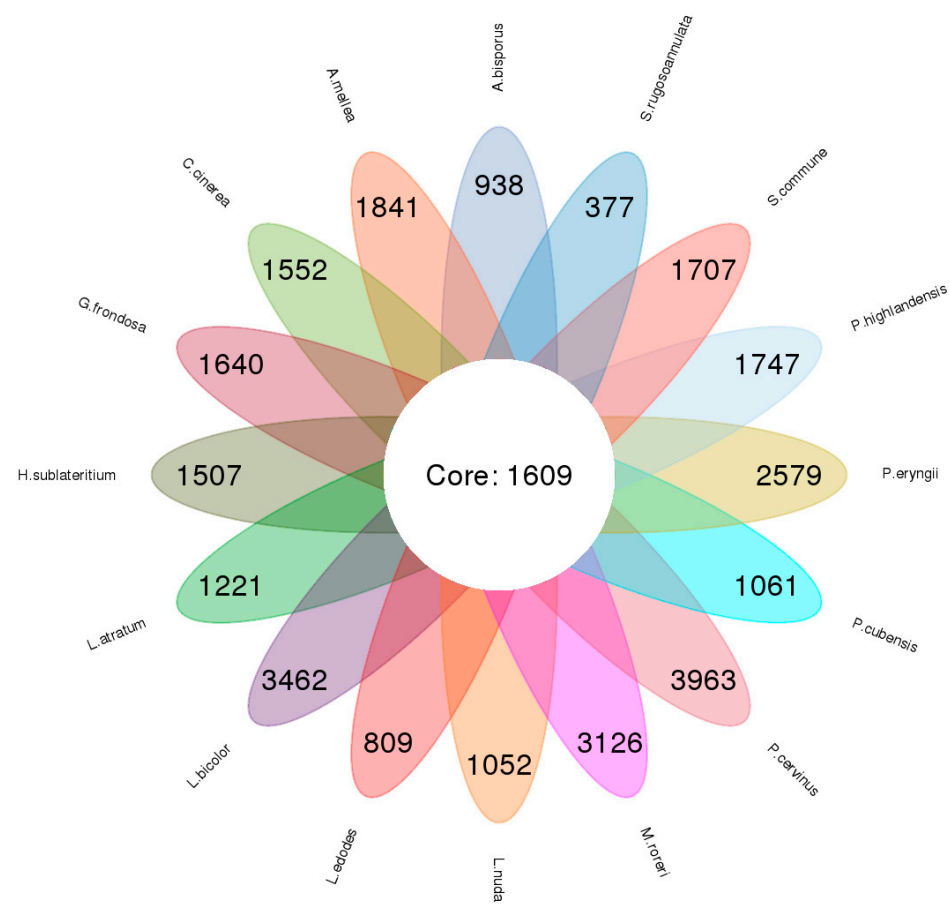

Figure S6. Venn diagram of orthologous gene families

Figure S7.

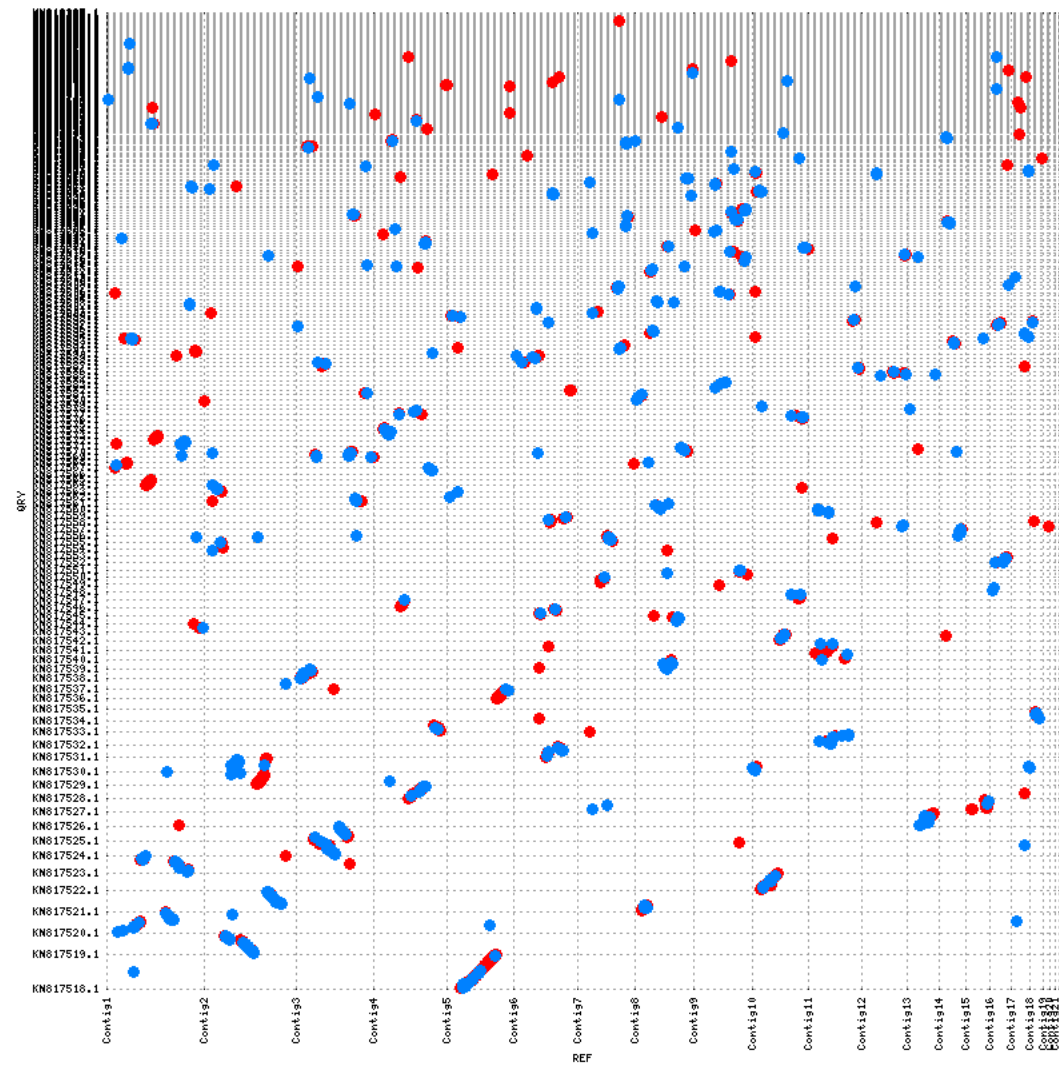

Figure S7. Colinear comparison of the whole genomes of *Stropharia rugosoannulata* and *Hypholoma sublateritium* using MUMmer plots

The red dots represent sequence collinearity, and the blue dots represent sequence inversion.



**Figure S8.**

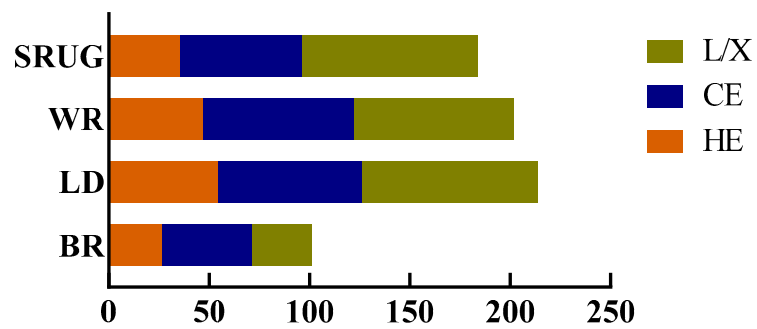

Figure S8. Comparison analysis of the number of predicted proteins involved in the degradation HE (hemicellulose), CE (cellulose), and L/X (lignin/xenobiotics)

The X-axis shows the number of genes and the Y-axis shows the nutritional strategies and *S. rugosoannulata*. LD: litter decomposers, BR: brown-rot fungi, WR: white-rot fungi, SRUG: *S. rugosoannulata*

## Figure S9.

### Cluster 1

Contig1, NRPS-like, Location: 4035697 - 4079731 nt (total 44035 nt)

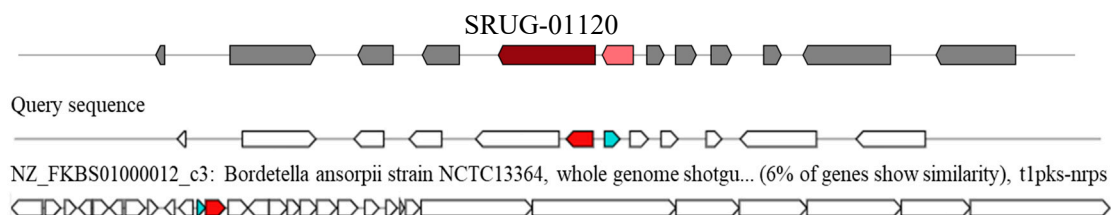

### Cluster 2

Contig2, Region 2 -NRPS-like, Location: 338290 - 388136 nt (total 49847 nt)

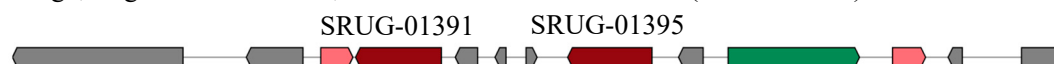

### Cluster 3

Contig2, Region 2 - NRPS-like, Location: 408253 - 464478 nt (total 56226 nt)

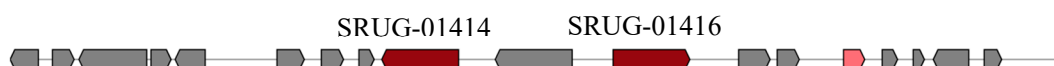

### Cluster 4

Contig2, Region 3 - siderophore, Location 3397577 - 3409795 nt (total 12219 nt)

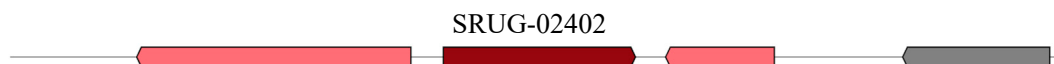

Query sequence

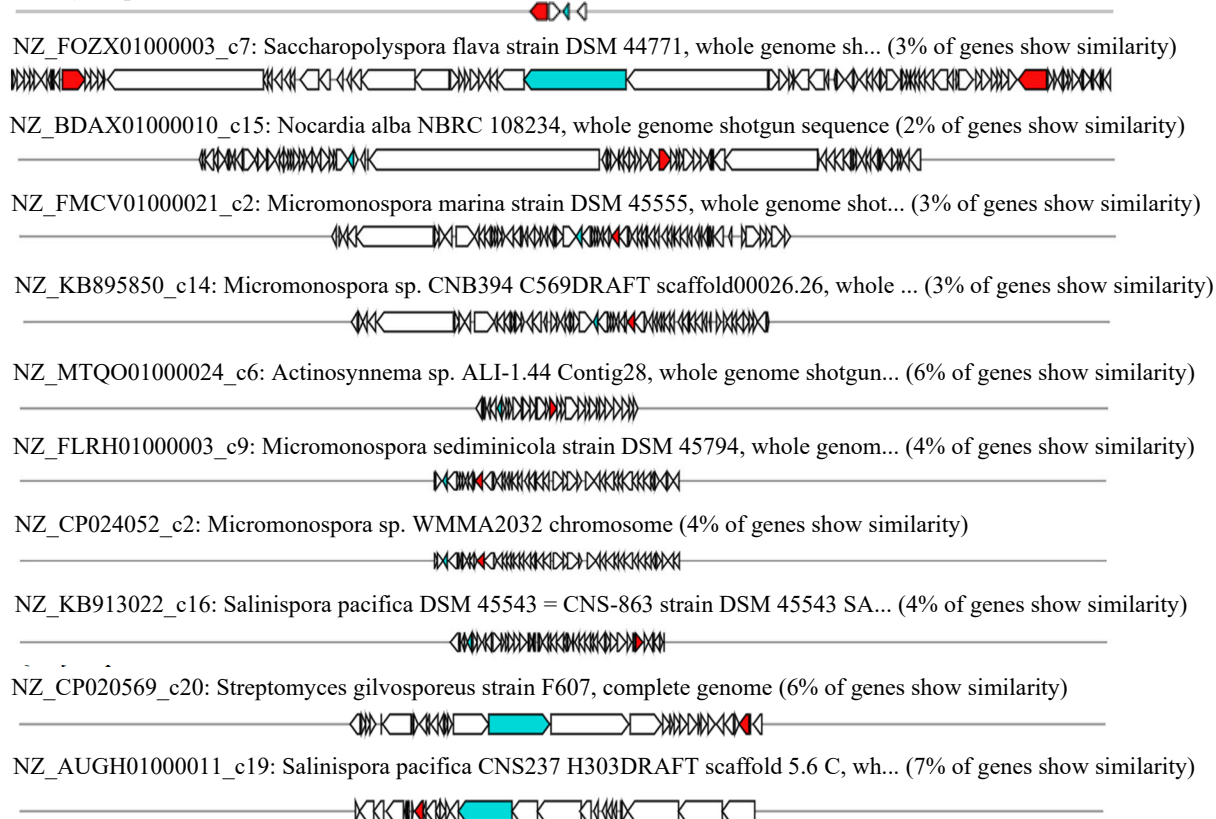

### Cluster5

Contig3, Region 1 - terpene, Location: 666283 - 687725 nt (total 21443 nt)

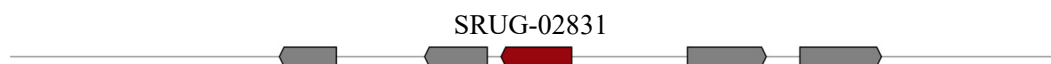

### Cluster6

Contig3, Region 2 - NRPS, Location: 1783703 - 1831735 nt (total 48033 nt)

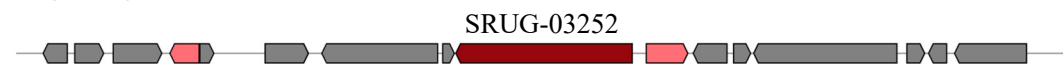

Query sequence

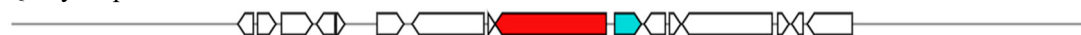

NZ\_MSCT01000018\_c6: *Pseudomonas chlororaphis* strain PCL1601 cnt18, whole geno... (8% of genes show similarity)

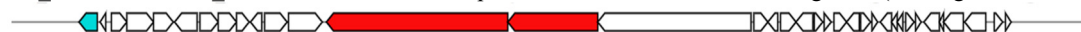

NZ\_LT629746\_c5: *Pseudomonas lini* strain BS3782 genome assembly, chromosome: I (8% of genes show similarity)

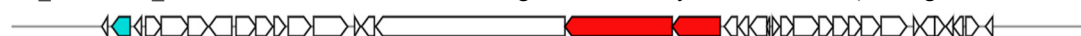

NZ\_MPJD01000010\_c1: *Pseudomonas versuta* strain A4R1.12 10, whole genome shotg... (8% of genes show similarity)

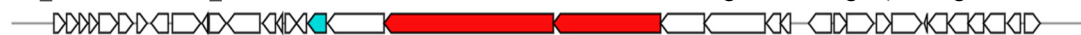

NZ\_FNPW01000021\_c12: *Pseudomonas* sp. NFIX28, whole genome shotgun sequence (8% of genes show similarity)

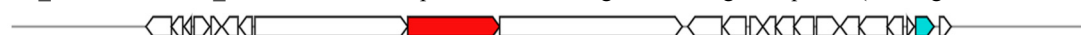

NC\_014640\_c5: *Achromobacter xylosoxidans* A8, complete genome (4% of genes show similarity)

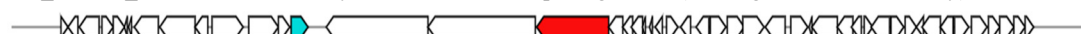

NZ\_KB900108\_c1: *Pseudomonas* sp. 35MFCvi1.1 F571DRAFT scaffold00001.1, whole g... (4% of genes show similarity)

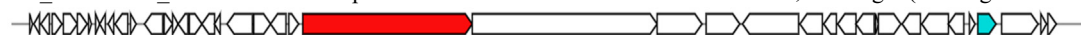

NZ\_LIUV01000019\_c4: *Pseudomonas* sp. 655 contig 19, whole genome shotgun sequence (9% of genes show similarity)

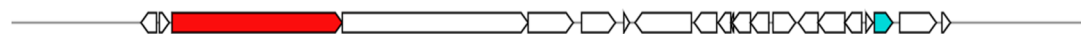

NZ\_KN639174\_c6: *Pseudomonas fluorescens* strain PA3G8 Scaffold2, whole genome ... (6% of genes show similarity)

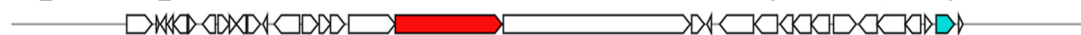

NZ\_LT906435\_c3: *Pandora* sp. sputorum strain NCTC13161 genome assembly, chromoso... (3% of genes show similarity)

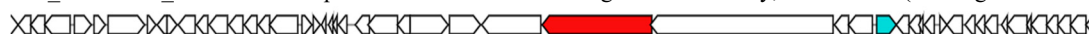

NZ\_LIRD01000005\_c8: *Pseudomonas* sp. In5 P.sp In5 contig 5, whole genome shotg... (5% of genes show similarity)

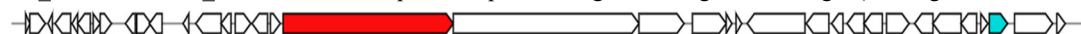

### Cluster 7

Contig4, Region 1 – siderophore, Location: 1960289 - 1972449 nt (total: 12161 nt)

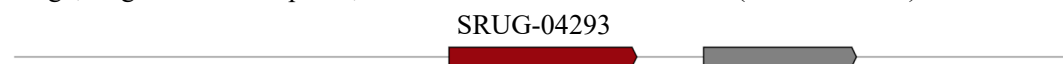

### Cluster 8

Contig4, Region 2 – terpene, Location: 2395330 - 2416595 nt (total: 21266 nt)

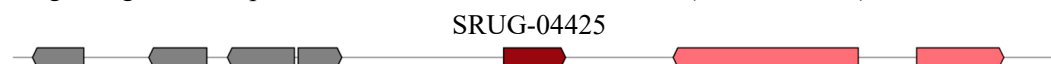

### Cluster 9

Contig4 - Region 3 - NRPS-like, Location: 3572551 - 3616679 nt (total: 44129 nt)

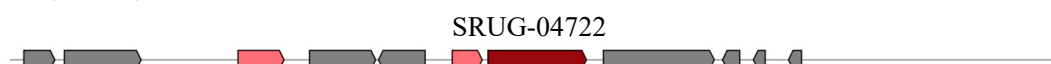

### Cluster 10

Contig5, Region 1 – terpene, Location: 1053109 - 1074431 nt (total: 21323 nt)

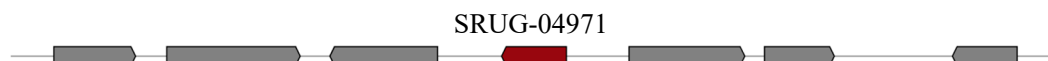

### Cluster 11

Contig6, Region 1 – terpene, Location: 340380 - 355479 nt (total: 15100 nt)

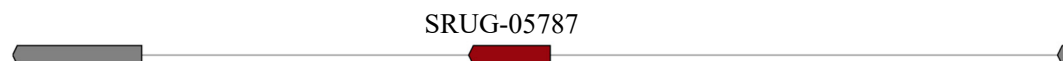

### Cluster 12

Contig6, Region 2 – terpene, Location: 647505 - 679621 nt. (total: 32117 nt)

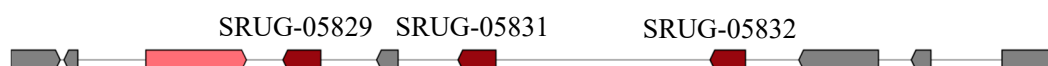

### Cluster 13

Contig6, Region 3 – terpene, Location: 2077,902 - 2099118 nt (total: 21,217 nt)

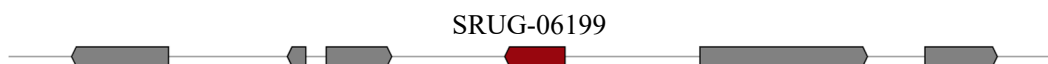

### Cluster 14

Contig7, Region 1 – terpene, Location: 465221 - 485608 nt (total: 20388 nt)

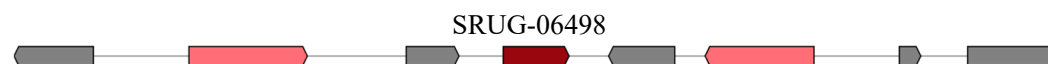

### Cluster 15

Contig7, Region 2 - NRPS-like, Location: 1626863 - 1674587 nt (total: 47725 nt)

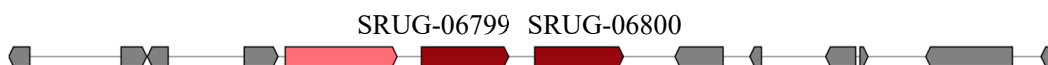

Query sequence

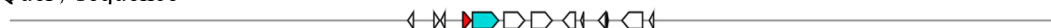

NZ\_LPBD01000019\_c2: Burkholderia ubonensis strain MSMB1801WGS MSMB1801WGS 116... (1% of genes show similarity)

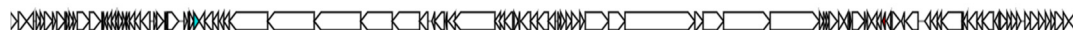

### Cluster 16

Contig7, Region 3 - terpene, Location: 2536998 - 2555968 nt (total: 18971 nt)

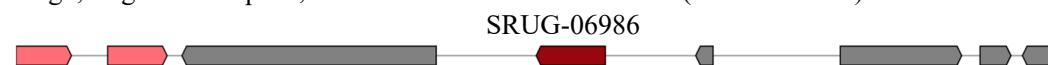

### Cluster 17

Contig7, Region 4 – terpene, Location: 2567855 - 2589139 nt (total: 21285 nt)

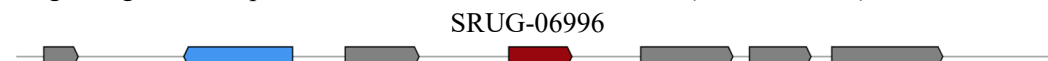

### Cluster 18

Contig8, Region 1 - NRPS-like, Location: 239884 - 283810 nt (total: 43927 nt)

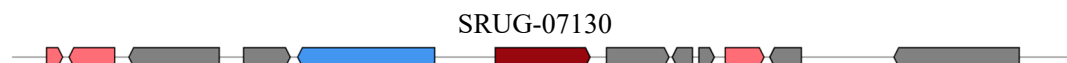

Query sequence

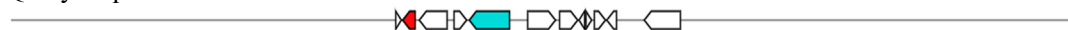

NZ\_LMOL01000005\_c2: *Arthrobacter* sp. Leaf141 contig 13, whole genome shotgun ... (5% of genes show similarity)

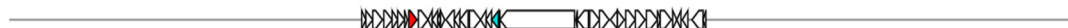

NC\_008541\_c4: *Arthrobacter* sp. FB24, complete genome (5% of genes show similarity)

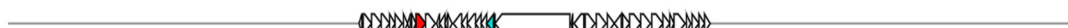

NZ\_LNUT01000005\_c4: *Arthrobacter* sp. EPSL27 Scaffold 5, whole genome shotgun ... (5% of genes show similarity)

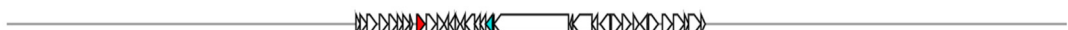

NZ\_FOEF01000002\_c12: *Amycolatopsis saalfeldensis* strain DSM 44993, whole geno... (3% of genes show similarity)

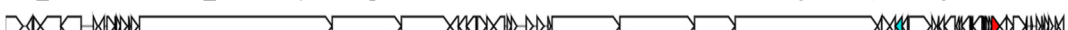

NZ\_KQ758467\_c1: *Microbacterium enclense* strain NIO-1002 Scaffold1, whole geno... (4% of genes show similarity)

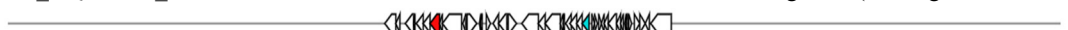

NZ\_LUUK01000136\_c11: *Methylomonas koyamae* strain R-45383 contig 221 1..2554 ... (100% of genes show similarity)

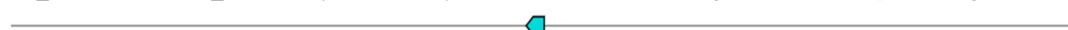

### Cluster 19

Contig8, Region 2 – terpene, Location: 1148201 - 1164861 nt (total 16661 nt)

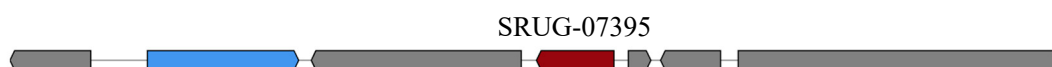

### Cluster 20

Contig8, Region 3 – terpene, Location: 2224009 - 2245487 nt (total 21479 nt)

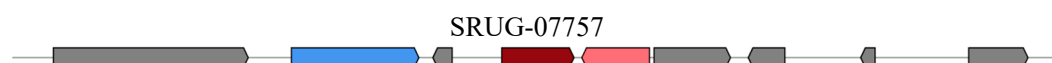

## Cluster 21

Contig8, Region 4 - T1PKS, Location: 2256646 - 2303282 nt (total 46637 nt)

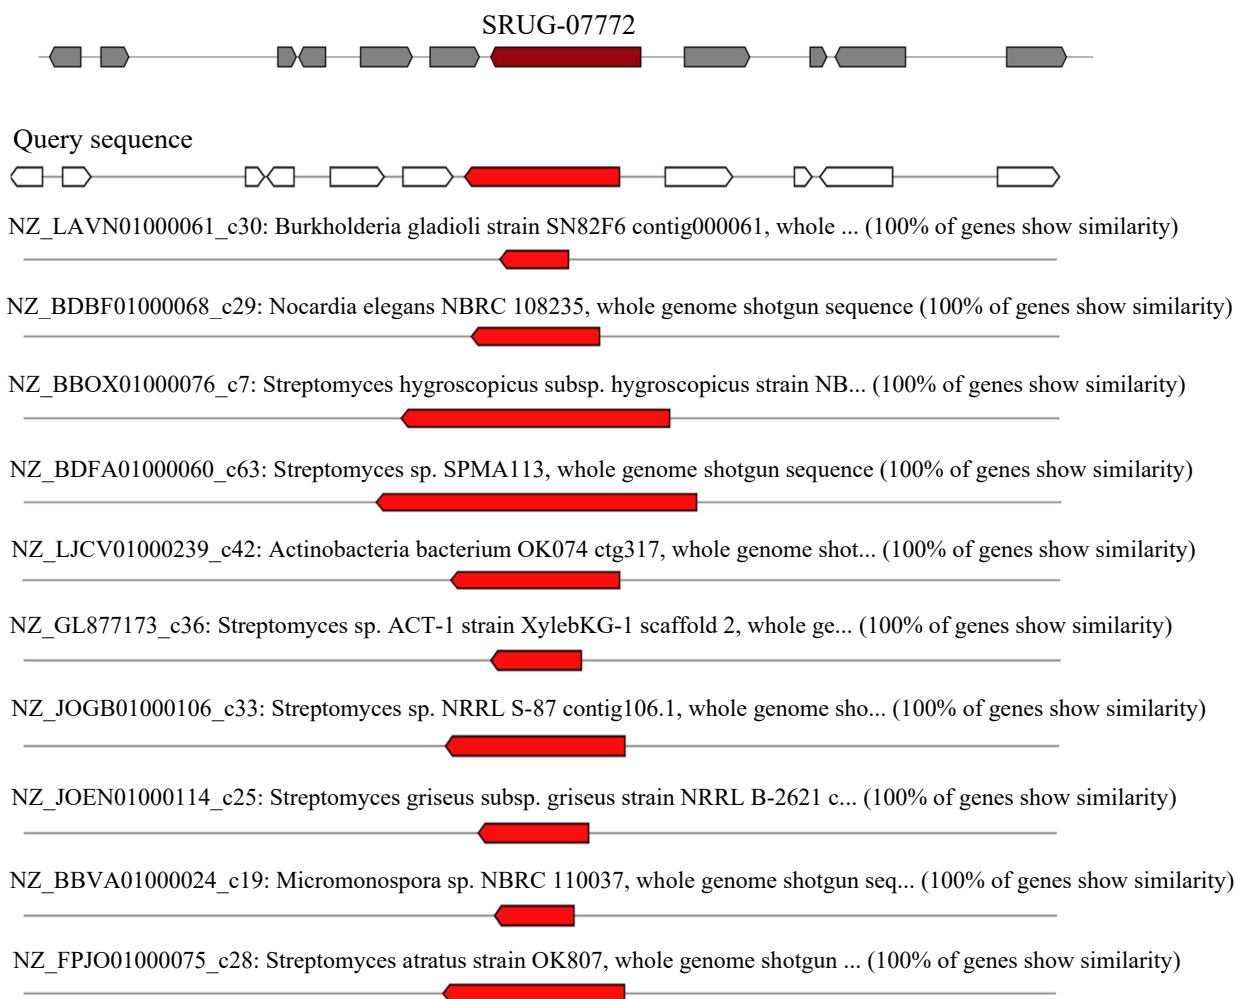

## Cluster 22

Contig9, Region 1 - NRPS-like, Location: 233391 - 255448 nt (total: 22058 nt)

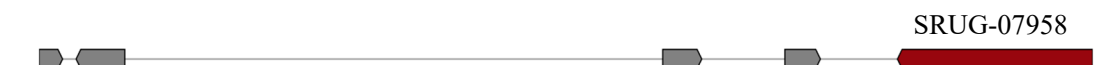

## Cluster 23

Contig9, Region 2 – terpene, Location: 1580441 - 1600518 nt (total: 20078 nt)

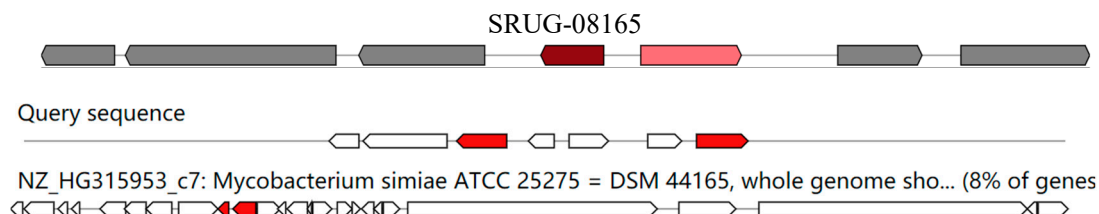

## Cluster 24

Contig9, Region 3 – terpene, Location: 2160936 - 2182205 nt (total 21270 nt)

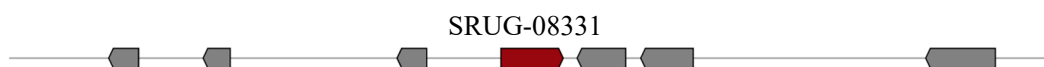

## Cluster 25

Contig9, Region 4 - NRPS-like,T1PKS, Location: 2562731 - 2610976 nt (total: 48246 nt)

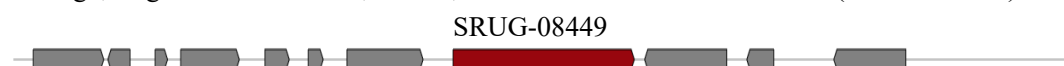

Query sequence

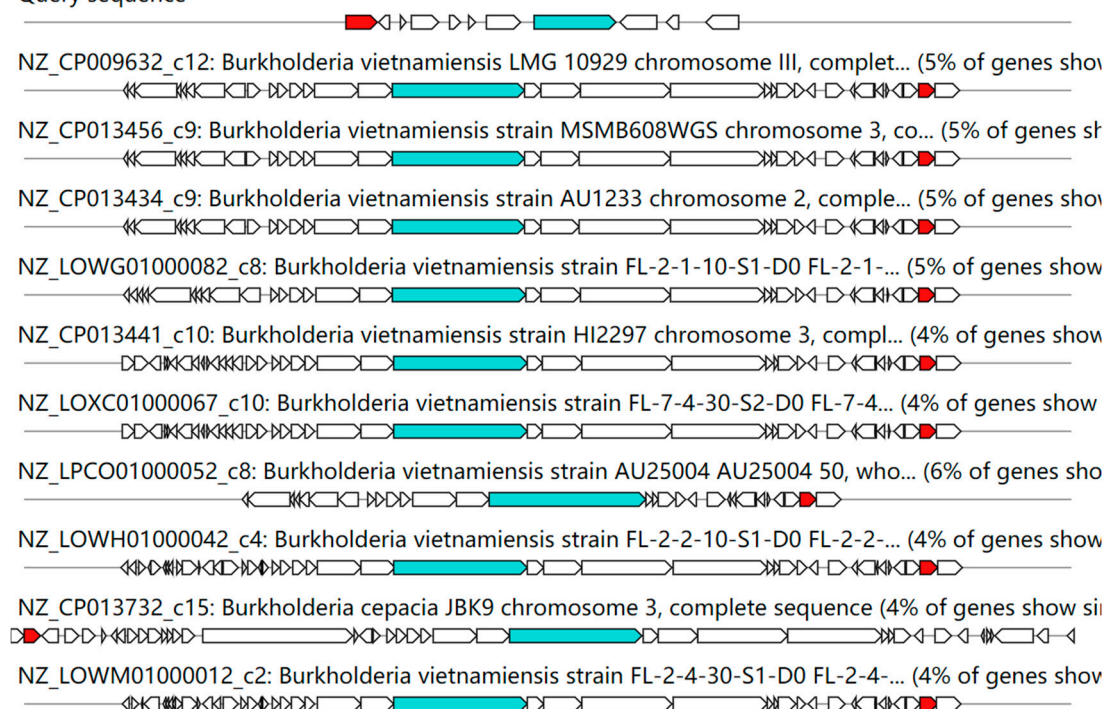

## Cluster 26

Contig10, Region 1 - NRPS-like, Location: 2251608 - 2297150 nt (total 45543 nt)

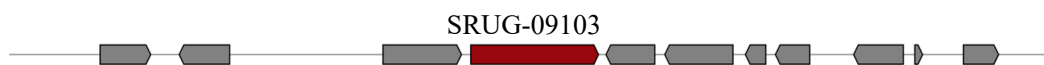

Query sequence

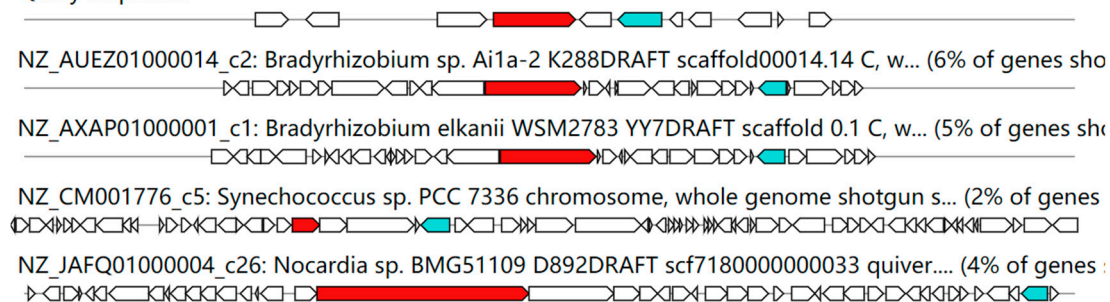



### Cluster 27

Contig10, Region 2 – terpene, Location: 2384642 - 2406483 nt (total 21842 nt)

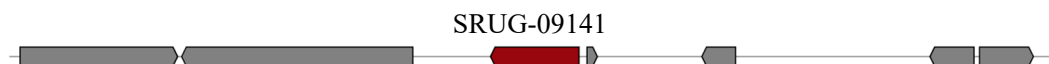

### Cluster 28

Contig11, Region 1 - NRPS-like, Location: 1656079 - 1700094 nt (total 44016 nt)

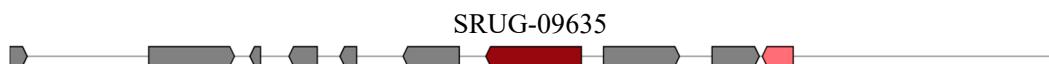

### Cluster 29

Contig12, Region 1 – indole, Location: 679975 - 698519 nt (total 18545 nt)

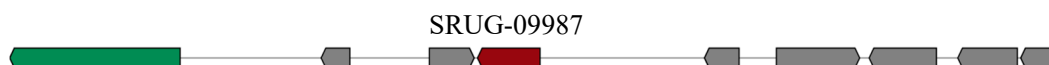

### Cluster 30

Contig12, Region 2 – terpene, Location: 1482858 - 1503883 nt (total 21026 nt)

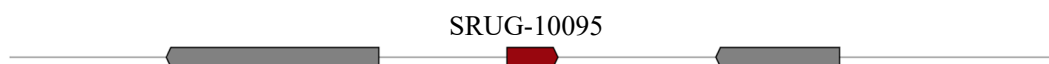

### Cluster 31

Contig12, Region 3 – indole, Location: 1656043 - 1677263 nt (total 21221 nt)

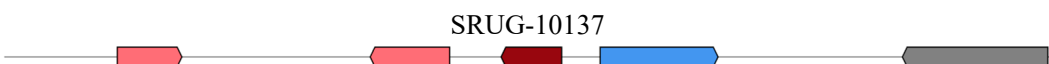

### Cluster 32

Contig12, Region 4 - NRPS-like, Location: 2124080 - 2168664 nt (total 44585 nt)

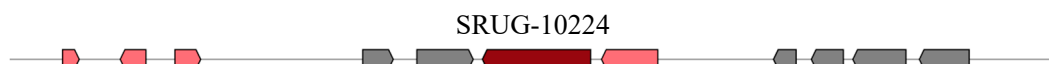

### Query sequence

|                                                                                                |                    |
|------------------------------------------------------------------------------------------------|--------------------|
| NZ_AVCRO2000041_c17: <i>Pseudomonas syringae</i> pv. <i>syringae</i> 1212 contig41.1, whole... | (100% of genes sl  |
| NZ_LIHU01000015_c5: <i>Pseudomonas syringae</i> pv. <i>syringae</i> strain 2339 syri2339 co... | (100% of genes sho |
| NZ_AQOH01000303_c26: <i>Pseudomonas fuscovaginae</i> SE-1 303, whole genome shotgun ...        | (100% of gen       |
| NZ_LKGV01000071_c19: <i>Pseudomonas syringae</i> ICMP 11168 scaffold73, whole genome...        | (100% of gene      |
| NZ_LJRP01000111_c28: <i>Pseudomonas syringae</i> pv. <i>aptata</i> strain ICMP459 PttICMP45... | (100% of genes s   |
| NZ_FOQB01000021_c11: <i>Pseudomonas syringae</i> strain BS3827, whole genome shotgun...        | (100% of gene      |
| NZ_JXDG01000028_c10: <i>Pseudomonas batumici</i> strain UCM B-321 Contig 28, whole g...        | (100% of genes     |
| NZ_LYUP01000062_c14: <i>Pseudomonas syringae</i> pv. <i>syringae</i> strain 1845 contig0006... | (100% of genes sh  |
| NZ_LJPO01000063_c3: <i>Pseudomonas syringae</i> pv. <i>atrofaciens</i> strain ICMP4394 PafI... | (100% of genes shc |
| NZ_ATSV01000091_c24: <i>Pseudomonas syringae</i> pv. <i>syringae</i> CRAFRU12 contig91, who... | (100% of genes     |



### Cluster 33

Contig15, Region 1 – terpene, Location: 1153025 - 1174185 nt (total 21161 nt)

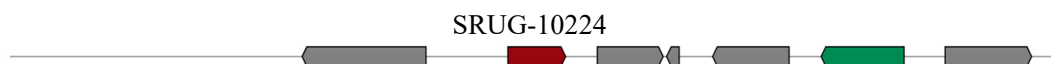

### Cluster 34

Contig16, Region 1 – indole, Location: 513075 - 534267 nt. (total 21193 nt)

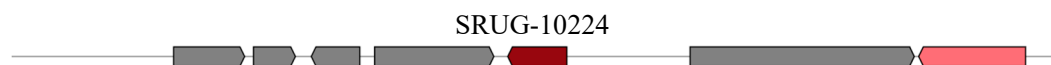

Query sequence

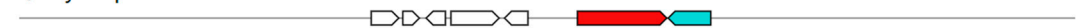

NZ\_JNWZ01000042\_c14: Kitasatospora phosalacinea strain NRRL B-16230 contig42.... (5% of genes show

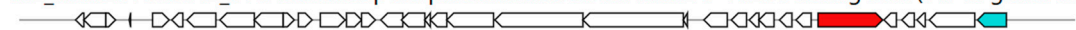

NC\_018266\_c11: Amycolatopsis mediterranei S699, complete genome (4% of genes show similarity), t1p

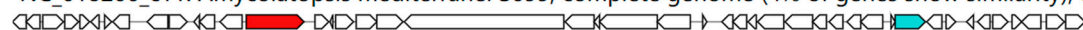

Figure S9. Biosynthetic gene clusters in the *Stropharia rugosoannulata* genome

The genes with predicted functions are: core biosynthetic genes (  ), additional biosynthetic genes (  ), transport-related genes (  ), regulatory genes (  ) and other genes (  ).

**Table S1 Sequencing data used for the genome assembly**

| <b>Library</b> | <b>Sequencing platform</b> | <b>Insert size</b> | <b>Raw data (Gb)</b> | <b>Clean data (GB)</b> | <b>Sequence coverage (X)</b> | <b>Application</b>               |
|----------------|----------------------------|--------------------|----------------------|------------------------|------------------------------|----------------------------------|
| Genome         | Illumina HiSeq X Ten       | 350bp              | 7.06                 | 6.52                   | 129                          | Genome survey and assessment     |
| Genome         | PacBio SEQUEL              | 20 kb              | 14.57                | 14.55                  | 266                          | Contig assembly                  |
| Transcriptome  | Illumina HiSeq™            | 400bp              | 6.89                 | 6.31                   | 126                          | Genome annotation and assessment |

**Table S2 The genome information of comparative analysis species**

| Abbreviated<br>taxon name | Classification                                  |                | assembly size<br>(Mbp) | Protein-coding<br>genes | core genes | common<br>genes | unique<br>genes | Total repeat length<br>(%) | GC content<br>(%) |
|---------------------------|-------------------------------------------------|----------------|------------------------|-------------------------|------------|-----------------|-----------------|----------------------------|-------------------|
| Agabi                     | Agaricaceae (Agaricales, Basidiomycota)         | Agaricoid      | 30.74                  | 11278                   | 1609       | 8731            | 938             | 13.83                      | 46.5              |
| Armmel                    | Physalacriaceae (Agaricales,<br>Basidiomycota)  | Marasmiod      | 70.86                  | 15553                   | 1609       | 12103           | 1841            | 10.45                      | 48                |
| Copci                     | Psathyrellaceae (Agaricales,<br>Basidiomycota)  | Agaricoid      | 36.19                  | 13356                   | 1609       | 10195           | 1552            | 6.678                      | 51.6              |
| Grifr                     | Grifolaceae (Polyporales, Basidiomycota)        | Polyporales    | 40.58                  | 15039                   | 1609       | 11790           | 1640            | 18.08                      | 49.5              |
| Hypsu                     | Strophariaceae (Agaricales,<br>Basidiomycota)   | Agaricoid      | 48                     | 17771                   | 1609       | 14655           | 1507            | 1.1                        | 51                |
| Lacbi                     | Hydnangiaceae (Agaricales,<br>Basidiomycota)    | Agaricoid      | 64.87                  | 18215                   | 1609       | 13144           | 3462            | 22.05                      | 47.1              |
| Lened                     | Omphalotaceae (Agaricales,<br>Basidiomycota)    | Marasmiod      | 46.1                   | 10927                   | 1609       | 8509            | 809             | 17.7                       | 45.33             |
| Lepnud                    | Tricholomataceae (Agaricales,<br>Basidiomycota) | Tricholomatoid | 43.49                  | 14876                   | 1609       | 12215           | 1052            | 8.115                      | 46.2              |
| Lyoat                     | Lyophyllaceae (Agaricales,<br>Basidiomycota)    | Tricholomatoid | 64.89                  | 15046                   | 1609       | 12216           | 1221            | 6.61                       | 51.3              |
| Monro                     | Marasmiaceae (Agaricales,<br>Basidiomycota)     | Marasmiod      | 54.79                  | 20131                   | 1609       | 15396           | 3126            | 13.13                      | 46.7              |
| <i>Phohig</i>             | Strophariaceae (Agaricales,<br>Basidiomycota)   | Agaricoid      | 66.04                  | 17628                   | 1609       | 14272           | 1747            | 5.51                       | 49                |
| Pleery                    | Pleurotaceae (Agaricales, Basidiomycota)        | Pluteoid       | 47.26                  | 15954                   | 1609       | 11766           | 2579            | 18.187                     | 49.35             |

|        |                                              |           |       |       |      |       |      |       |        |
|--------|----------------------------------------------|-----------|-------|-------|------|-------|------|-------|--------|
| Plucer | Pluteaceae (Agaricales, Basidiomycota)       | Pluteoid  | 52.19 | 19812 | 1609 | 14240 | 3963 | 19.4  | 48.7   |
| Psicub | Hymenogastraceae (Agaricales, Basidiomycota) | Agaricoid | 41.3  | 13236 | 1609 | 10566 | 1061 | 14.2  | 46     |
| Schco  | Schizophyllaceae (Agaricales, Basidiomycota) | Marasmiod | 38.15 | 13193 | 1609 | 9877  | 1707 | 11.2  | 57.529 |
| Strru  | Strophariaceae (Agaricales, Basidiomycota)   | Agaricoid | 48.33 | 11750 | 1609 | 9764  | 377  | 19.91 | 47.35  |

---

Abbreviated taxon name: Agabi: *Agaricus bisporus*; Armmel: *Armillaria mellea*; Copci: *Coprinopsis cinerea*; Grifr: *Grifola frondosa*; Hypsu: *Hypholoma sublateritium*; Lacbi: *Laccaria bicolor*; Lened: *Lentinula edodes*; Lepnud: *Lepista nuda*; Lyoat: *Lyophyllum atratum*; Monro: *Moniliophthora roreri*; Phohig: *Pholiota highlandensis*; Pleery: *Pleurotus eryngii*; Plucer: *Pluteus cervinus*; Psicub: *Psilocybe cubensis*; Schco: *Schizophyllum commune*; Strru: *Stropharia rugosoannulata*.

**Table S3 The assembled results of *Stropharia rugosoannulata* genome**

| # | Stat Type   | Contig Length | Contig Number | Scaffold Length | Scaffold Number |
|---|-------------|---------------|---------------|-----------------|-----------------|
|   | N50         | 2961130       | 7             | 2961130         | 7               |
|   | N60         | 2955062       | 8             | 2955062         | 8               |
|   | N70         | 2902069       | 10            | 2902069         | 10              |
|   | N80         | 2310885       | 12            | 2310885         | 12              |
|   | N90         | 1348662       | 14            | 1348662         | 14              |
|   | Longest     | 4928370       | 1             | 4928370         | 1               |
|   | Total       | 48331048      | 21            | 48331048        | 21              |
|   | Length>=1kb | 48331048      | 21            | 48331048        | 21              |
|   | Length>=2kb | 48331048      | 21            | 48331048        | 21              |
|   | Length>=5kb | 48331048      | 21            | 48331048        | 21              |

**Table S4 Summary statistics for telomere repeats in the assembly.**

| Contig    | Contig length | Telomere length | Number of Telomeric Repeats | Strand | Start   | end             |
|-----------|---------------|-----------------|-----------------------------|--------|---------|-----------------|
| Contig 1  | 4928370       | 91              |                             | 13     | CCCTAAA | 3 93            |
| Contig 2  | 4665326       | 121             |                             | 17     | CCCTAAA | 9 129           |
| Contig 3  | 3966484       | 105             |                             | 15     | CCCTAAA | 5 109           |
|           |               | 175             |                             | 25     | TTTAGGG | 3966308 3966482 |
| Contig 4  | 3692652       | 140             |                             | 20     | TTTAGGG | 3692511 3692650 |
| Contig 5  | 3360661 /     | /               |                             |        |         | / /             |
| Contig 6  | 3254096       | 154             |                             | 22     | TTTAGGG | 3253937 3254090 |
| Contig 7  | 2961130       | 104             |                             | 14     | CCCTAAA | 1 104           |
|           |               | 119             |                             | 17     | TTTAGGG | 2961008 2961126 |
| Contig 8  | 2955062       | 182             |                             | 26     | TTTAGGG | 2954879 2955061 |
| Contig 9  | 2950788       | 133             |                             | 19     | CCCTAAA | 5 137           |
| Contig 10 | 2902069       | 175             |                             | 25     | TTTAGGG | 2901895 2902069 |
| Contig 11 | 2694211       | 91              |                             | 13     | CCCTAAA | 3 93            |
| Contig 12 | 2310885       | 56              |                             | 8      | CCCTAAA | 6 61            |
| Contig 13 | 1579960 /     | /               |                             |        |         | / /             |
| Contig 14 | 1348662       | 119             |                             | 17     | CCCTAAA | 1 119           |
| Contig 15 | 1265009 /     | /               |                             |        |         | / /             |
| Contig 16 | 1082040       | 126             |                             | 18     | CCCTAAA | 1 126           |
| Contig 17 | 950328 /      | /               |                             |        |         | / /             |
| Contig 18 | 647927        | 97              |                             | 13     | TTTAGGG | 647828 647924   |
| Contig 19 | 343027        | 147             |                             | 21     | TTTAGGG | 342880 343026   |
| Contig 20 | 289444 /      | /               |                             |        |         | / /             |
| Contig 21 | 182917        | 126             |                             | 18     | CCCTAAA | 3 128           |

**Table S5 Genome information of SR68 and MG69**

| <b>Characteristics</b>    | <b>SR-68</b>     | <b>MG69</b> |
|---------------------------|------------------|-------------|
| Genome assembly size (Mb) | 48.33            | 49.5        |
| Sequencing depth          | 266              | 51          |
| Contigs                   | 21               | 17725       |
| Longest contig (kb)       | 4928             | 131         |
| N50 (kb)                  | 2961             | 8.32        |
| GC (%)                    | 47.35            | 47.8        |
| Protein-coding genes      | 11750            | 17683       |
| Busco result              | 94.14%           | 87.60%      |
| Sequencing method         | PacBio, Illumina | Illumina    |

**Table S6-1 Prediction results of gene structure**

| Gene set  | Total number of genes | Average gene length(bp) | Average CDS length(bp) | Average exons number per gene | Average exon length(bp) | Average intron length(bp) |
|-----------|-----------------------|-------------------------|------------------------|-------------------------------|-------------------------|---------------------------|
| De novo   | 12673                 | 1934.13                 | 1419.55                | 7.02                          | 202.12                  | 85.43                     |
| Homology  | 11747                 | 2647.74                 | 1435.65                | 6                             | 239.34                  | 242.5                     |
| RNA-seq   | 6376                  | 2010.14                 | 1647.83                | 6.79                          | 242.79                  | 62.61                     |
| Final set | 11750                 | 1942.05                 | 1455.07                | 6.25                          | 232.84                  | 92.77                     |

**Table S6-2 BUSCO prediction**

| Type                                | Number | Percent (%) |
|-------------------------------------|--------|-------------|
| Complete BUSCOs (C)                 | 273    | 94.14       |
| Complete and single-copy BUSCOs (S) | 271    | 93.45       |
| Complete and duplicated BUSCOs (D)  | 2      | 0.69        |
| Fragmented BUSCOs (F)               | 4      | 1.38        |
| Missing BUSCOs (M)                  | 13     | 4.48        |
| Total BUSCO groups searched         | 290    | 100         |

**Table S6-3 Gene function annotation**

| Type       | Database  | Number | Percent (%) |
|------------|-----------|--------|-------------|
| Annotation | Swissprot | 6746   | 57.41       |
|            | KEGG      | 3826   | 32.56       |
|            | KOG       | 3280   | 27.91       |
|            | GO        | 5496   | 46.77       |
|            | NR        | 11359  | 96.67       |



|       |           |       |       |
|-------|-----------|-------|-------|
| Total | Annotated | 11377 | 96.83 |
|       | Gene      | 11750 | -     |

---

**Table S7 GO analysis of secreted proteins**

| <b>Ontology</b> | <b>GO ID</b> | <b>GO Term</b>                                          | <b>P value</b> | <b>FDR</b> | <b>Gene Ratio</b> | <b>BgRatio</b> |
|-----------------|--------------|---------------------------------------------------------|----------------|------------|-------------------|----------------|
| MF              | GO:0016787   | hydrolase activity                                      | 9.58E-48       | 1.81E-45   | 207               | 945            |
| CC              | GO:0005576   | extracellular region                                    | 4.03E-47       | 1.29E-45   | 41                | 47             |
| CC              | GO:0005618   | cell wall                                               | 8.42E-45       | 8.98E-44   | 41                | 50             |
| CC              | GO:0030312   | external encapsulating structure                        | 8.42E-45       | 8.98E-44   | 41                | 50             |
| CC              | GO:0009277   | fungal-type cell wall                                   | 3.86E-42       | 3.09E-41   | 39                | 48             |
| BP              | GO:0005975   | carbohydrate metabolic process                          | 5.45E-41       | 1.21E-38   | 97                | 259            |
| MF              | GO:0004553   | hydrolase activity, hydrolyzing O-glycosyl compounds    | 1.17E-38       | 1.10E-36   | 72                | 149            |
| MF              | GO:0016798   | hydrolase activity, acting on glycosyl bonds            | 1.78E-38       | 1.12E-36   | 73                | 154            |
| MF              | GO:0001871   | pattern binding                                         | 8.49E-37       | 3.21E-35   | 36                | 38             |
| MF              | GO:0030247   | polysaccharide binding                                  | 8.49E-37       | 3.21E-35   | 36                | 38             |
| MF              | GO:0003824   | catalytic activity                                      | 2.58E-33       | 7.12E-32   | 346               | 2710           |
| MF              | GO:0005199   | structural constituent of cell wall                     | 2.64E-33       | 7.12E-32   | 39                | 49             |
| CC              | GO:0071944   | cell periphery                                          | 6.94E-33       | 4.44E-32   | 41                | 76             |
| MF              | GO:0030246   | carbohydrate binding                                    | 2.20E-32       | 5.20E-31   | 45                | 68             |
| MF              | GO:0030248   | cellulose binding                                       | 1.78E-30       | 3.73E-29   | 29                | 30             |
| MF              | GO:0070011   | peptidase activity, acting on L-amino acid peptides     | 1.15E-29       | 2.16E-28   | 74                | 203            |
| MF              | GO:0008233   | peptidase activity                                      | 4.46E-29       | 7.67E-28   | 75                | 212            |
| MF              | GO:0008236   | serine-type peptidase activity                          | 1.08E-23       | 1.57E-22   | 37                | 64             |
| MF              | GO:0017171   | serine hydrolase activity                               | 1.08E-23       | 1.57E-22   | 37                | 64             |
| BP              | GO:0008152   | metabolic process                                       | 2.73E-23       | 3.03E-21   | 283               | 2483           |
| MF              | GO:0004175   | endopeptidase activity                                  | 7.30E-22       | 9.86E-21   | 46                | 108            |
| MF              | GO:0004601   | peroxidase activity                                     | 1.96E-21       | 2.47E-20   | 32                | 53             |
| MF              | GO:0016684   | oxidoreductase activity, acting on peroxide as acceptor | 9.08E-20       | 1.07E-18   | 32                | 58             |
| BP              | GO:0006508   | proteolysis                                             | 2.61E-19       | 1.93E-17   | 59                | 191            |

|    |            |                                                          |          |            |     |     |
|----|------------|----------------------------------------------------------|----------|------------|-----|-----|
| MF | GO:0016209 | antioxidant activity                                     | 1.49E-17 | 1.66E-16   | 32  | 66  |
| MF | GO:0004180 | carboxypeptidase activity                                | 1.22E-15 | 1.28E-14   | 18  | 23  |
| MF | GO:0004185 | serine-type carboxypeptidase activity                    | 2.82E-15 | 2.80E-14   | 17  | 21  |
| MF | GO:0004190 | aspartic-type endopeptidase activity                     | 1.50E-14 | 1.35E-13   | 19  | 28  |
| MF | GO:0070001 | aspartic-type peptidase activity                         | 1.50E-14 | 1.35E-13   | 19  | 28  |
| BP | GO:0006979 | response to oxidative stress                             | 3.24E-14 | 1.80E-12   | 23  | 42  |
| MF | GO:0070008 | serine-type exopeptidase activity                        | 4.04E-14 | 3.47E-13   | 17  | 23  |
| MF | GO:0050660 | flavin adenine dinucleotide binding                      | 3.97E-12 | 3.27E-11   | 40  | 141 |
| MF | GO:0008238 | exopeptidase activity                                    | 6.07E-10 | 4.78E-09   | 18  | 39  |
| MF | GO:0005198 | structural molecule activity                             | 4.22E-09 | 3.19E-08   | 39  | 167 |
| CC | GO:0005615 | extracellular space                                      | 7.88E-09 | 3.60E-08   | 8   | 10  |
| CC | GO:0044421 | extracellular region part                                | 7.88E-09 | 3.60E-08   | 8   | 10  |
| BP | GO:0000272 | polysaccharide catabolic process                         | 4.32E-08 | 1.92E-06   | 7   | 7   |
| MF | GO:0016614 | oxidoreductase activity, acting on CH-OH group of donors | 6.31E-08 | 4.58E-07   | 24  | 83  |
| BP | GO:0055114 | oxidation-reduction process                              | 7.81E-08 | 2.89E-06   | 95  | 652 |
| MF | GO:0016491 | oxidoreductase activity                                  | 9.72E-08 | 6.80E-07   | 105 | 754 |
| MF | GO:0008237 | metallopeptidase activity                                | 1.43E-07 | 9.50E-07   | 18  | 52  |
| MF | GO:0004252 | serine-type endopeptidase activity                       | 1.46E-07 | 9.50E-07   | 13  | 28  |
| MF | GO:0004222 | metalloendopeptidase activity                            | 1.93E-07 | 1.22E-06   | 14  | 33  |
| MF | GO:0004650 | polygalacturonase activity                               | 2.60E-07 | 1.54E-06   | 7   | 8   |
| MF | GO:2001070 | starch binding                                           | 2.60E-07 | 1.54E-06   | 7   | 8   |
| MF | GO:0020037 | heme binding                                             | 1.87E-06 | 1.04E-05   | 39  | 207 |
| MF | GO:0046906 | tetrapyrrole binding                                     | 1.87E-06 | 1.04E-05   | 39  | 207 |
| MF | GO:0004339 | glucan 1,4-alpha-glucosidase activity                    | 4.79E-06 | 2.59E-05   | 5   | 5   |
| MF | GO:0016788 | hydrolase activity, acting on ester bonds                | 4.96E-06 | 2.61E-05   | 34  | 176 |
| BP | GO:0005976 | polysaccharide metabolic process                         | 1.04E-05 | 0.00032875 | 7   | 11  |

|    |            |                                                                                                                               |          |            |     |      |
|----|------------|-------------------------------------------------------------------------------------------------------------------------------|----------|------------|-----|------|
| MF | GO:0015926 | glucosidase activity                                                                                                          | 2.67E-05 | 0.00013642 | 5   | 6    |
| MF | GO:0050662 | coenzyme binding                                                                                                              | 2.76E-05 | 0.00013751 | 40  | 239  |
| BP | GO:0071554 | cell wall organization or biogenesis                                                                                          | 3.27E-05 | 0.00090622 | 6   | 9    |
| MF | GO:0071949 | FAD binding                                                                                                                   | 0.000103 | 0.0004991  | 15  | 59   |
| MF | GO:0052689 | carboxylic ester hydrolase activity                                                                                           | 0.000221 | 0.00104336 | 8   | 21   |
| BP | GO:0006950 | response to stress                                                                                                            | 0.000246 | 0.00605579 | 25  | 134  |
| BP | GO:0016052 | carbohydrate catabolic process                                                                                                | 0.000393 | 0.00872251 | 8   | 22   |
| MF | GO:0003796 | lysozyme activity                                                                                                             | 0.000648 | 0.00291392 | 3   | 3    |
| MF | GO:0045735 | nutrient reservoir activity                                                                                                   | 0.000648 | 0.00291392 | 3   | 3    |
| MF | GO:0005507 | copper ion binding                                                                                                            | 0.000702 | 0.00308755 | 7   | 19   |
| BP | GO:0000270 | peptidoglycan metabolic process                                                                                               | 0.000711 | 0.00876893 | 3   | 3    |
| BP | GO:0006026 | aminoglycan catabolic process                                                                                                 | 0.000711 | 0.00876893 | 3   | 3    |
| BP | GO:0006027 | glycosaminoglycan catabolic process                                                                                           | 0.000711 | 0.00876893 | 3   | 3    |
| BP | GO:0009253 | peptidoglycan catabolic process                                                                                               | 0.000711 | 0.00876893 | 3   | 3    |
| BP | GO:0016998 | cell wall macromolecule catabolic process                                                                                     | 0.000711 | 0.00876893 | 3   | 3    |
| BP | GO:0030203 | glycosaminoglycan metabolic process                                                                                           | 0.000711 | 0.00876893 | 3   | 3    |
| BP | GO:0033609 | oxalate metabolic process                                                                                                     | 0.000711 | 0.00876893 | 3   | 3    |
| BP | GO:0044036 | cell wall macromolecule metabolic process                                                                                     | 0.000711 | 0.00876893 | 3   | 3    |
| MF | GO:0008199 | ferric iron binding                                                                                                           | 0.000726 | 0.00311721 | 4   | 6    |
| MF | GO:0048037 | cofactor binding                                                                                                              | 0.001034 | 0.00434197 | 41  | 291  |
| BP | GO:0044238 | primary metabolic process                                                                                                     | 0.001064 | 0.01243725 | 182 | 1748 |
| BP | GO:0071704 | organic substance metabolic process                                                                                           | 0.001727 | 0.01917044 | 190 | 1853 |
| MF | GO:0016702 | oxidoreductase activity, acting on single donors with incorporation of molecular oxygen, incorporation of two atoms of oxygen | 0.002267 | 0.00931439 | 5   | 12   |
| MF | GO:0030599 | pectinesterase activity                                                                                                       | 0.002423 | 0.00974283 | 3   | 4    |
| BP | GO:0042545 | cell wall modification                                                                                                        | 0.002655 | 0.02562442 | 3   | 4    |

|    |            |                                                                       |          |            |    |    |
|----|------------|-----------------------------------------------------------------------|----------|------------|----|----|
| BP | GO:0045229 | external encapsulating structure organization                         | 0.002655 | 0.02562442 | 3  | 4  |
| BP | GO:0071555 | cell wall organization                                                | 0.002655 | 0.02562442 | 3  | 4  |
| CC | GO:0042597 | periplasmic space                                                     | 0.003972 | 0.01588615 | 2  | 2  |
| MF | GO:0051213 | dioxygenase activity                                                  | 0.004953 | 0.01950208 | 5  | 14 |
| MF | GO:0016892 | endoribonuclease activity, producing 3'-phosphomonoesters             | 0.005667 | 0.02186034 | 3  | 5  |
| MF | GO:0016810 | hydrolase activity, acting on carbon-nitrogen (but not peptide) bonds | 0.006952 | 0.02444342 | 12 | 63 |
| MF | GO:0003756 | protein disulfide isomerase activity                                  | 0.007501 | 0.02444342 | 2  | 2  |
| MF | GO:0004104 | cholinesterase activity                                               | 0.007501 | 0.02444342 | 2  | 2  |
| MF | GO:0004560 | alpha-L-fucosidase activity                                           | 0.007501 | 0.02444342 | 2  | 2  |
| MF | GO:0004767 | sphingomyelin phosphodiesterase activity                              | 0.007501 | 0.02444342 | 2  | 2  |
| MF | GO:0015928 | fucosidase activity                                                   | 0.007501 | 0.02444342 | 2  | 2  |
| MF | GO:0016864 | intramolecular oxidoreductase activity, transposing S-S bonds         | 0.007501 | 0.02444342 | 2  | 2  |
| MF | GO:0033897 | ribonuclease T2 activity                                              | 0.007501 | 0.02444342 | 2  | 2  |
| MF | GO:0050525 | cutinase activity                                                     | 0.007501 | 0.02444342 | 2  | 2  |
| MF | GO:0008081 | phosphoric diester hydrolase activity                                 | 0.009205 | 0.02948731 | 6  | 22 |
| MF | GO:0008061 | chitin binding                                                        | 0.011231 | 0.03537741 | 4  | 11 |

---

**Table S8 Number of genes in a gene family**

| Species name                     | Genes Number | Genes number in families | Unclustered genes number | Family number | Unique Families number | Average genes number per family |
|----------------------------------|--------------|--------------------------|--------------------------|---------------|------------------------|---------------------------------|
| <i>Agaricus bisporus</i>         | 10,331       | 9,018                    | 1,313                    | 6,698         | 165                    | 1.35                            |
| <i>Armillaria mellea</i>         | 15,553       | 13,129                   | 2,424                    | 8,495         | 516                    | 1.55                            |
| <i>Coprinopsis cinerea</i>       | 13,350       | 10,662                   | 2,688                    | 7,763         | 417                    | 1.37                            |
| <i>Grifola frondosa</i>          | 15,038       | 10,172                   | 4,866                    | 7,157         | 472                    | 1.42                            |
| <i>Hypholoma sublateritium</i>   | 17,569       | 13,251                   | 4,318                    | 9,343         | 477                    | 1.42                            |
| <i>Lyophyllum atratum</i>        | 14,959       | 12,990                   | 1,969                    | 8,777         | 412                    | 1.48                            |
| <i>Laccaria bicolor</i>          | 18,215       | 14,069                   | 4,146                    | 8,342         | 944                    | 1.69                            |
| <i>Lentinula edodes</i>          | 13,998       | 9,588                    | 4,410                    | 7,545         | 267                    | 1.27                            |
| <i>Lepista nuda</i>              | 14,708       | 12,056                   | 2,652                    | 8,749         | 331                    | 1.38                            |
| <i>Moniliophthora roreri</i>     | 19,855       | 15,660                   | 4,195                    | 8,287         | 686                    | 1.89                            |
| <i>Pluteus cervinus</i>          | 19,497       | 15,685                   | 3,812                    | 8,508         | 701                    | 1.84                            |
| <i>Psilocybe cubensis</i>        | 13,236       | 11,438                   | 1,798                    | 8,421         | 303                    | 1.36                            |
| <i>Pleurotus eryngii</i>         | 15,758       | 12,548                   | 3,210                    | 8,276         | 646                    | 1.52                            |
| <i>Pholiota highlandensis</i>    | 17,628       | 14,910                   | 2,718                    | 8,997         | 564                    | 1.66                            |
| <i>Schizophyllum commune</i>     | 13,235       | 11,230                   | 2,005                    | 7,699         | 426                    | 1.46                            |
| <i>Stropharia rugosoannulata</i> | 11,750       | 10,967                   | 783                      | 8,341         | 131                    | 1.31                            |

**Table S9 Putative peroxidase-encoding genes of the 63 Agricomycotina[35]**

| Nutritional strategies     | Reference Name | Subphylum      | Haem peroxidase       |                                     |          |                         |                       |                                          |                   |                      |                      |                           |      |      |      | Non-haem peroxidase |       |       |                                                 |                                              |                                  |                                    |                                       |                                |                                    |      |       |    |
|----------------------------|----------------|----------------|-----------------------|-------------------------------------|----------|-------------------------|-----------------------|------------------------------------------|-------------------|----------------------|----------------------|---------------------------|------|------|------|---------------------|-------|-------|-------------------------------------------------|----------------------------------------------|----------------------------------|------------------------------------|---------------------------------------|--------------------------------|------------------------------------|------|-------|----|
|                            |                |                | Haloperoxidase (haem) | Linoleate diol synthase (PGHS like) | Catalase | Cytochrome C peroxidase | DyP-type peroxidase D | Hybrid Ascorbate-Cytochrome C peroxidase | Lignin peroxidase | Manganese peroxidase | Versatile peroxidase | Other class II peroxidase | NoxA | NoxB | NoxC | Doux                | Rbohs | total | Atypical 2-Cysteine peroxidoxin (typeII, typeV) | Atypical 2-Cysteine peroxidoxin (typeQ, BCP) | 1-Cysteine peroxidoxin (1CysPrx) | Carboxymuconolactone decarboxylase | Fungi-Bacteria glutathione peroxidase | Typical 2-Cysteine peroxidoxin | No haem, Vanadium chloroperoxidase | NoxR | total |    |
| biotroph (ectomycorrhizal) | Amamu          | Agricomycotina | 4                     | 3                                   | 2        | 1                       | 2                     | 1                                        | 0                 | 0                    | 0                    | 0                         | 1    | 1    | 0    | 0                   | 0     | 15    | 2                                               | 2                                            | 1                                | 1                                  | 1                                     | 2                              | 0                                  | 1    | 9     | 25 |
| biotroph (ectomycorrhizal) | Hebcy          | Agricomycotina | 7                     | 3                                   | 1        | 1                       | 2                     | 4                                        | 0                 | 3                    | 0                    | 0                         | 1    | 1    | 0    | 0                   | 0     | 23    | 2                                               | 2                                            | 1                                | 1                                  | 1                                     | 1                              | 0                                  | 1    | 8     | 32 |
| biotroph (ectomycorrhizal) | Lacam          | Agricomycotina | 8                     | 2                                   | 1        | 1                       | 2                     | 1                                        | 0                 | 1                    | 0                    | 0                         | 1    | 1    | 0    | 0                   | 0     | 18    | 2                                               | 2                                            | 1                                | 1                                  | 2                                     | 1                              | 0                                  | 1    | 9     | 28 |
| biotroph (ectomycorrhizal) | Lacbi          | Agricomycotina | 5                     | 2                                   | 1        | 1                       | 2                     | 1                                        | 0                 | 1                    | 0                    | 0                         | 1    | 1    | 0    | 0                   | 0     | 15    | 2                                               | 2                                            | 1                                | 1                                  | 1                                     | 1                              | 0                                  | 1    | 8     | 24 |
| biotroph (ectomycorrhizal) | Paxin          | Agricomycotina | 4                     | 2                                   | 4        | 2                       | 0                     | 0                                        | 0                 | 0                    | 0                    | 0                         | 1    | 1    | 0    | 0                   | 0     | 14    | 4                                               | 2                                            | 1                                | 0                                  | 1                                     | 2                              | 0                                  | 1    | 10    | 25 |
| biotroph (ectomycorrhizal) | Paxru          | Agricomycotina | 4                     | 2                                   | 2        | 1                       | 0                     | 0                                        | 0                 | 0                    | 0                    | 0                         | 1    | 1    | 0    | 0                   | 0     | 11    | 2                                               | 1                                            | 1                                | 0                                  | 1                                     | 1                              | 0                                  | 1    | 6     | 18 |
| biotroph (ectomycorrhizal) | Pilcr          | Agricomycotina | 11                    | 4                                   | 2        | 1                       | 4                     | 0                                        | 0                 | 0                    | 0                    | 1                         | 1    | 1    | 0    | 0                   | 0     | 25    | 1                                               | 3                                            | 1                                | 3                                  | 1                                     | 1                              | 0                                  | 3    | 10    | 38 |
| biotroph (ectomycorrhizal) | Pismi          | Agricomycotina | 5                     | 1                                   | 1        | 1                       | 0                     | 0                                        | 0                 | 0                    | 0                    | 0                         | 1    | 1    | 0    | 0                   | 0     | 10    | 3                                               | 2                                            | 1                                | 0                                  | 1                                     | 1                              | 0                                  | 1    | 8     | 19 |
| biotroph (ectomycorrhizal) | Pisti          | Agricomycotina | 4                     | 1                                   | 1        | 1                       | 1                     | 0                                        | 0                 | 0                    | 0                    | 0                         | 1    | 1    | 0    | 0                   | 0     | 10    | 3                                               | 2                                            | 1                                | 0                                  | 1                                     | 1                              | 0                                  | 1    | 8     | 19 |
| biotroph (root endophyte)  | Pirin          | Agricomycotina | 2                     | 2                                   | 1        | 1                       | 2                     | 0                                        | 0                 | 0                    | 0                    | 0                         | 1    | 1    | 0    | 0                   | 0     | 10    | 1                                               | 1                                            | 1                                | 0                                  | 1                                     |                                | 0                                  | 1    | 4     | 15 |

|                            |       |                |    |   |   |   |    |   |   |    |   |   |   |   |   |   |   |    |   |   |   |   |   |   |   |   |    |    |
|----------------------------|-------|----------------|----|---|---|---|----|---|---|----|---|---|---|---|---|---|---|----|---|---|---|---|---|---|---|---|----|----|
| biotroph (ectomycorrhizal) | Selci | Agricomycotina | 4  | 1 | 1 | 1 | 1  | 0 | 0 | 0  | 0 | 0 | 1 | 1 | 0 | 0 | 0 | 10 | 2 | 2 | 3 | 0 | 1 | 1 | 0 | 1 | 9  | 20 |
| biotroph (ectomycorrhizal) | Suibr | Agricomycotina | 5  | 2 | 3 | 1 | 1  | 0 | 0 | 0  | 0 | 0 | 1 | 1 | 0 | 0 | 0 | 14 | 2 | 2 | 1 | 0 | 1 | 2 | 0 | 1 | 8  | 23 |
| biotroph (ectomycorrhizal) | Suilu | Agricomycotina | 5  | 2 | 3 | 1 | 1  | 0 | 0 | 0  | 0 | 0 | 1 | 1 | 0 | 0 | 0 | 14 | 2 | 2 | 1 | 0 | 1 | 1 | 0 | 1 | 7  | 22 |
| biotroph (orchid symbiont) | Sebve | Agricomycotina | 0  | 3 | 1 | 1 | 3  | 0 | 0 | 0  | 0 | 0 | 1 | 1 | 0 | 0 | 0 | 10 | 1 | 1 | 1 | 0 | 1 | 0 | 0 | 1 | 4  | 15 |
| biotroph (mycoparasite)    | Treme | Agricomycotina | 0  | 0 | 1 | 2 | 0  | 0 | 0 | 0  | 0 | 0 | 1 | 1 | 0 | 0 | 0 | 5  | 1 | 2 | 1 | 0 | 2 | 1 | 0 | 1 | 7  | 13 |
| biotroph (orchid symbiont) | Tulca | Agricomycotina | 2  | 4 | 2 | 1 | 2  | 0 | 0 | 0  | 0 | 0 | 1 | 2 | 0 | 0 | 0 | 14 | 4 | 3 | 1 | 0 | 1 | 1 | 0 | 3 | 10 | 27 |
| BR                         | Calco | Agricomycotina | 7  | 3 | 2 | 1 | 0  | 0 | 0 | 0  | 0 | 0 | 1 | 1 | 0 | 0 | 0 | 15 | 2 | 3 | 1 | 0 |   | 1 | 0 | 1 | 7  | 23 |
| BR                         | Calvi | Agricomycotina | 6  | 2 | 3 | 1 |    | 0 | 0 | 0  | 0 | 0 | 1 | 1 | 0 | 0 | 0 | 14 | 1 | 2 | 1 | 0 | 1 | 1 | 0 | 1 | 6  | 21 |
| BR                         | Conpu | Agricomycotina | 2  | 2 | 3 | 1 | 0  | 0 | 0 | 0  | 0 | 0 | 1 | 1 | 0 | 0 | 0 | 10 | 2 | 2 | 1 | 3 | 1 | 1 | 0 | 0 | 10 | 20 |
| BR                         | Dacsp | Agricomycotina | 6  | 3 | 3 | 1 | 0  | 0 | 0 | 0  | 0 | 0 | 1 | 1 | 0 | 0 | 0 | 15 | 1 | 3 | 1 | 0 | 1 | 1 | 0 | 1 | 7  | 23 |
| BR                         | Daequ | Agricomycotina | 4  | 2 | 4 | 1 | 0  | 0 | 0 | 0  | 0 | 1 | 1 | 1 | 0 | 0 | 0 | 14 | 2 | 2 | 1 | 0 | 1 | 1 | 0 | 1 | 7  | 22 |
| BR                         | Fishe | Agricomycotina | 3  | 2 | 2 | 1 | 0  | 0 | 0 | 0  | 0 | 0 | 0 | 1 | 0 | 0 | 0 | 9  | 2 | 2 | 1 | 1 | 1 | 1 | 0 | 1 | 8  | 18 |
| BR                         | Fompi | Agricomycotina | 4  | 5 | 3 | 1 | 0  | 0 | 0 | 0  | 0 | 1 | 1 | 1 | 0 | 0 | 0 | 16 | 2 | 2 | 1 | 0 | 1 | 1 | 0 | 1 | 7  | 24 |
| BR                         | Glotr | Agricomycotina | 6  | 3 | 4 | 1 | 0  | 0 | 0 | 0  | 0 | 0 | 1 | 1 | 0 | 0 | 0 | 16 | 2 | 2 | 1 | 0 | 1 | 1 | 0 | 1 | 7  | 24 |
| BR                         | Hydpi | Agricomycotina | 4  | 2 | 3 | 1 | 1  | 0 | 0 | 0  | 0 | 0 | 0 | 1 | 0 | 0 | 0 | 12 | 2 | 2 | 1 | 0 | 1 | 1 | 0 | 1 | 7  | 20 |
| BR                         | Laesu | Agricomycotina | 5  | 6 | 4 | 1 | 0  | 0 | 0 | 0  | 0 | 1 | 1 | 1 | 0 | 0 | 0 | 19 | 2 | 2 | 1 | 0 | 1 | 1 | 0 | 1 | 7  | 27 |
| BR                         | Neole | Agricomycotina | 9  | 3 | 3 | 1 | 0  | 0 | 0 | 0  | 0 | 0 | 1 | 1 | 0 | 0 | 0 | 18 | 2 | 2 | 1 | 0 | 1 | 1 | 0 | 1 | 7  | 26 |
| BR                         | Pospl | Agricomycotina | 8  | 4 | 8 | 1 | 2  | 0 | 0 | 0  | 0 | 2 | 2 | 2 | 0 | 0 | 0 | 29 | 4 | 1 | 2 | 0 | 2 | 2 | 0 | 2 | 11 | 42 |
| BR                         | Serla | Agricomycotina | 3  | 2 | 4 | 1 | 0  | 0 | 0 | 0  | 0 | 0 | 1 | 1 | 0 | 0 | 0 | 12 | 2 | 2 | 1 | 0 | 1 | 1 | 0 | 1 | 7  | 20 |
| BR                         | Wolco | Agricomycotina | 5  | 2 | 4 | 1 | 0  | 0 | 0 | 0  | 0 | 1 | 1 | 1 | 0 | 0 | 0 | 15 | 2 | 2 | 1 | 0 | 1 | 1 | 0 | 1 | 7  | 23 |
| LD                         | Agabi | Agricomycotina | 24 | 2 | 3 | 1 | 0  | 2 | 0 | 2  | 0 | 0 | 1 | 1 | 0 | 0 | 0 | 36 | 2 | 2 | 1 | 1 | 1 | 1 | 0 | 1 | 8  | 45 |
| LD                         | Amath | Agricomycotina | 4  | 4 | 1 | 1 | 1  | 1 | 0 | 0  | 0 | 0 | 1 | 1 | 0 | 0 | 0 | 14 | 3 | 2 | 1 | 1 | 1 | 1 | 0 | 1 | 9  | 24 |
| LD                         | Copci | Agricomycotina | 8  | 2 | 4 | 1 | 3  | 2 | 0 | 0  | 0 | 1 | 1 | 1 | 0 | 0 | 0 | 23 | 2 | 2 | 1 | 1 | 1 | 1 | 0 | 1 | 8  | 32 |
| LD                         | Gymlu | Agricomycotina | 14 | 2 | 5 | 1 | 12 | 8 | 0 | 5  | 0 | 0 | 1 | 2 | 0 | 0 | 0 | 50 | 2 | 2 | 5 | 2 | 1 | 2 | 0 | 1 | 14 | 65 |
| WR                         | Aursu | Agricomycotina | 16 | 2 | 3 | 1 | 11 | 4 | 0 | 18 | 0 | 0 | 1 | 1 | 0 | 0 | 0 | 57 | 2 | 2 | 1 | 2 | 1 | 1 | 0 | 2 | 9  | 68 |



|    |       |                |    |   |   |   |    |    |    |    |   |   |   |   |   |   |   |    |   |   |   |   |   |   |   |   |    |     |
|----|-------|----------------|----|---|---|---|----|----|----|----|---|---|---|---|---|---|---|----|---|---|---|---|---|---|---|---|----|-----|
| WR | Bjead | Agricomycotina | 4  | 3 | 4 | 1 | 12 | 0  | 12 | 7  | 1 |   | 1 | 1 | 0 | 0 | 0 | 46 | 2 | 2 | 2 | 1 | 1 | 1 | 0 | 1 | 9  | 56  |
| WR | Botbo | Agricomycotina | 7  | 4 | 3 | 1 | 3  | 0  | 0  | 0  | 0 | 0 | 1 | 1 | 0 | 0 | 0 | 20 | 3 | 1 | 1 | 0 | 1 | 1 | 0 | 1 | 7  | 28  |
| WR | Cylto | Agricomycotina | 5  | 2 | 3 | 1 | 0  | 1  | 0  | 0  | 0 | 0 | 1 | 1 | 0 | 0 | 0 | 14 | 2 | 1 | 1 | 1 | 1 | 2 | 0 | 1 | 8  | 23  |
| WR | Dicsq | Agricomycotina | 4  | 3 | 3 | 1 | 1  | 1  | 0  | 9  | 3 | 0 | 1 | 1 | 0 | 0 | 0 | 27 | 3 | 3 | 1 | 4 | 1 | 1 | 0 | 1 | 13 | 41  |
| WR | Exigl | Agricomycotina | 30 | 2 | 3 | 1 | 0  | 11 | 0  | 34 | 0 | 0 | 1 | 1 | 0 | 0 | 0 | 83 | 9 | 3 | 1 | 1 | 1 | 1 | 0 | 2 | 16 | 101 |
| WR | Fibsp | Agricomycotina | 35 | 5 | 5 | 1 | 2  | 0  | 0  | 0  | 0 | 0 | 2 | 1 | 0 | 0 | 0 | 51 | 4 | 4 | 1 | 1 | 1 | 1 | 0 | 2 | 12 | 65  |
| WR | Fomme | Agricomycotina | 4  | 3 | 2 | 1 | 3  | 0  | 0  | 17 | 0 | 0 | 1 | 1 | 0 | 0 | 0 | 32 | 2 | 2 | 1 | 1 | 1 | 1 | 0 | 1 | 8  | 41  |
| WR | Galma | Agricomycotina | 24 | 7 | 4 | 1 | 5  | 10 | 0  | 23 | 0 | 0 | 1 | 2 | 0 | 0 | 0 | 77 | 2 | 2 | 2 | 1 | 2 | 1 | 0 | 1 | 10 | 88  |
| WR | Gansp | Agricomycotina | 4  | 2 | 3 | 1 | 3  | 1  | 0  | 8  | 0 | 1 | 1 | 1 | 0 | 0 | 0 | 25 | 3 | 2 | 1 | 3 | 1 | 1 | 0 | 1 | 11 | 37  |
| WR | Hetan | Agricomycotina | 4  | 2 | 3 | 1 | 1  | 4  | 0  | 6  | 0 | 0 | 1 | 1 | 0 | 0 | 0 | 23 | 1 | 2 | 1 | 2 | 0 |   | 0 | 0 | 6  | 29  |
| WR | Hetir | Agricomycotina | 5  | 2 | 3 | 1 | 1  | 4  | 0  | 7  | 0 | 0 | 1 | 1 | 0 | 0 | 0 | 25 | 1 | 2 | 1 | 2 | 0 | 1 | 0 | 1 | 7  | 33  |
| WR | Hypsu | Agricomycotina | 13 | 5 | 2 | 1 | 2  | 7  | 0  | 14 | 0 | 0 | 1 | 1 | 0 | 0 | 0 | 46 | 2 | 3 | 2 | 1 | 1 | 1 | 0 | 1 | 10 | 57  |
| WR | Jaaar | Agricomycotina | 8  | 4 | 2 |   | 1  | 0  | 0  | 1  | 0 | 0 | 1 | 1 | 0 | 0 | 0 | 18 | 2 | 2 | 1 | 1 | 1 | 1 | 0 | 1 | 8  | 27  |
| WR | Lenti | Agricomycotina | 4  | 2 | 3 | 1 | 1  | 3  | 0  | 18 | 2 | 1 | 1 | 1 | 0 | 0 | 0 | 37 | 3 | 2 | 1 | 1 | 1 | 1 | 0 | 1 | 9  | 47  |
| WR | Ompol | Agricomycotina | 9  | 3 | 3 | 1 | 1  | 0  | 0  | 5  | 0 | 1 | 1 | 2 | 0 | 0 | 0 | 26 | 2 | 2 | 3 | 1 | 1 | 1 | 0 | 1 | 10 | 37  |
| WR | Phach | Agricomycotina | 3  | 3 | 5 | 1 | 0  | 0  | 10 | 5  | 0 | 1 | 1 | 1 | 0 | 0 | 0 | 30 | 2 | 2 | 2 | 1 | 1 | 1 | 0 | 1 | 9  | 40  |
| WR | Phlbr | Agricomycotina | 3  | 3 | 3 | 1 | 3  | 0  | 5  | 9  | 0 | 0 | 1 | 1 | 0 | 0 | 0 | 29 | 2 | 2 | 2 | 2 | 1 | 1 | 0 | 1 | 10 | 40  |
| WR | Phlgi | Agricomycotina | 4  | 4 | 2 | 1 | 5  | 0  | 3  | 5  | 0 | 1 | 1 | 1 | 0 | 0 | 0 | 27 | 2 | 2 | 2 | 1 | 1 | 1 | 0 | 1 | 9  | 37  |
| WR | Pleos | Agricomycotina | 4  | 2 | 2 | 1 | 4  | 0  | 0  | 5  | 4 | 0 | 1 | 1 | 0 | 0 | 0 | 24 | 2 | 1 | 3 | 2 | 1 | 1 | 0 | 1 | 10 | 35  |
| WR | Pleos | Agricomycotina | 4  | 4 | 2 | 1 | 4  | 0  | 0  | 5  | 4 | 0 | 1 | 1 | 0 | 0 | 0 | 26 | 2 | 1 | 3 | 2 |   | 1 | 0 | 1 | 9  | 36  |
| WR | Plicr | Agricomycotina | 3  | 3 | 1 | 1 | 0  | 0  | 0  | 7  | 0 | 0 | 1 | 1 | 0 | 0 | 0 | 17 | 3 | 2 | 1 | 2 | 1 | 1 | 0 | 1 | 10 | 28  |
| WR | Polar | Agricomycotina | 4  | 2 | 5 | 1 | 1  | 2  | 0  | 14 | 0 | 3 | 1 | 1 | 0 | 0 | 0 | 34 | 3 | 2 | 1 | 1 | 1 | 1 | 0 | 1 | 9  | 44  |
| WR | Punst | Agricomycotina | 8  | 2 | 2 | 1 | 5  | 1  | 0  | 11 | 0 | 0 | 1 | 1 | 0 | 0 | 0 | 32 | 2 | 2 | 1 | 1 | 1 | 1 | 0 | 2 | 8  | 42  |
| WR | Schco | Agricomycotina | 3  | 2 | 2 | 1 | 0  | 1  | 0  | 0  | 0 | 0 | 1 | 1 | 0 | 0 | 0 | 11 | 2 | 2 | 2 | 1 | 1 | 2 | 0 | 1 | 10 | 22  |
| WR | Sissu | Agricomycotina | 33 | 6 | 4 | 1 | 0  | 1  | 0  | 15 | 0 | 1 | 1 | 1 | 0 | 0 | 0 | 63 | 2 | 2 | 1 | 1 | 1 | 1 | 0 | 1 | 8  | 72  |

|    |       |                |    |   |   |   |   |    |    |    |   |   |   |   |   |   |   |    |   |   |   |   |   |   |   |   |    |    |
|----|-------|----------------|----|---|---|---|---|----|----|----|---|---|---|---|---|---|---|----|---|---|---|---|---|---|---|---|----|----|
| WR | Trave | Agricomycotina | 3  | 2 | 3 | 1 | 2 | 0  | 11 | 14 | 1 | 0 | 1 | 1 | 0 | 0 | 0 | 39 | 3 | 2 | 1 | 1 | 1 | 1 | 0 | 1 | 9  | 49 |
| WR | Stehi | Agricomycotina | 10 | 3 | 3 | 1 | 2 | 1  | 0  | 6  | 0 | 0 | 1 | 2 | 0 | 0 | 0 | 29 | 1 | 3 | 1 | 3 |   | 1 | 0 | 1 | 9  | 39 |
| WR | Stru  | Agricomycotina | 14 | 4 | 1 | 1 | 1 | 10 | 0  | 17 | 0 | 0 | 1 | 1 | 0 | 0 | 0 | 50 | 2 | 3 | 2 | 1 | 1 | 1 | 0 | 1 | 10 | 61 |
|    |       |                | 7  | 3 | 3 | 1 | 2 | 1  | 1  | 5  | 0 | 0 | 1 | 1 | 0 | 0 | 0 | 25 | 2 | 2 | 1 | 1 | 1 | 1 | 0 | 1 | 9  | 35 |

Reference Name: Amamu: *Amanita muscaria* Koide; Hebey: *Hebeloma cylindrosporum* h7; Lacam: *Laccaria amethystina* LaAM-08-12; Lacbi: *Laccaria bicolor*; Paxin: *Paxillus involutus* ATCC 200175; Paxru: *Paxillus rubicundulus* Ve08.2h10; Pilcr: *Piloderma croceum* F 1598; Pismi: *Pisolithus microcarpus* 441; Pisti: *Pisolithus tinctorius* Marx 270; Pirin: *Piriformospora indica* DSM 11827; Selci: *Scleroderma citrinum* Foug A; Suibr: *Suillus brevipes* Sb2 2; Suilu: *Suillus luteus* UH-Slu-Lm8-n1; Sebve: *Sebacina vermifera* MAFF 305830; Treme: *Tremella mesenterica*; Tulca: *Tulasnella calospora* AL13; Calco: *Calocera cornea*; Calvi: *Calocera viscosa*; Conpu: *Coniophora puteana*; Dacsp: *Dacryopinax* sp. DJM 731 SSP1; Daequ: *Daedalea quercina*; Fishe: *Fistulina hepatica*; Fompi: *Fomitopsis pinicola* FP-58527 SS1; Glotr: *Gloeophyllum trabeum*; Hydpi: *Hydnomerulius pinastris*; Laesu: *Laetiporus sulphureus* var. *sulphureus*; Neole: *Neolentinus lepideus*; Pospl: *Postia placenta* 1; Serla: *Serpula lacrymans* S7.3; Wolco: *Wolfiporia cocos*; Agabi: *Agaricus bisporus*; Amath: *Amanita thiersii* Skay4041; Copci: *Coprinopsis cinerea* okayama7; Gymlu: *Gymnopus luxurians*; Aursu: *Auricularia subglabra*; Bjead: *Bjerkandera adusta* 1; Botbo: *Botryobasidium botryosum*; Cylto: *Cylindrobasidium torrendii*; Dicsq: *Dichomitus squalens* ; Exigl: *Exidia glandulosa*; Fibsp: *Fibulorhizoctonia* sp. CBS 109695; Fomme: *Fomitiporia mediterranea*; Galma: *Galerina marginata*; Gansp: *Ganoderma* sp. 10597 SS1; Hetan: *Heterobasidion annosum* 03012 (FBL); Hetir: *Heterobasidion irregulare* TC 32-1; Hypsu: *Hypholoma sublateritium*; Jaaar: *Jaapia argillacea*; Lenti: *Lentinus tigrinus*; Ompol: *Omphalotus olearius*; Phach: *Phanerochaete chrysosporium* 2.1; Phlbr: *Phlebia brevispora* HHB-7030 SS6; Phlgi: *Phlebiopsis gigantea* 1; Pleos: *Pleurotus ostreatus* PC15; Pleos: *Pleurotus ostreatus* PC9; Plicr: *Plicaturopsis crispa*; Polar: *Polyporus arcularius*; Punst: *Punctularia strigosozonata*; Schco: *Schizophyllum commune* H4-8; Sissu: *Sistotremastrum suecicum*; Trave: *Trametes versicolor*; Stehi: *Stereum hirsutum* FP-91666 SS1; Stru: *Stropharia rugosoannulata*

**Table S10 17 MnP genes classification**

|                | <b>trp171</b> | <b>Glu35</b> | <b>Glu39</b> | <b>Asp179</b> |                       |
|----------------|---------------|--------------|--------------|---------------|-----------------------|
|                | <b>W</b>      | <b>E</b>     | <b>E</b>     | <b>D</b>      |                       |
| <b>Gene ID</b> | <b>Wc</b>     | <b>Mn Ea</b> | <b>Mn Eb</b> | <b>Mn Dc</b>  | <b>Classification</b> |
| SRUG_03862     | -             | D            | -            | +             | MnP atypical          |
| SRUG_03871     | -             | D            | -            | +             | MnP atypical          |
| SRUG_03872     | -             | D            | -            | +             | MnP atypical          |
| SRUG_04745     | -             | D            | -            | +             | MnP atypical          |
| SRUG_07844     | -             | D            | -            | +             | MnP atypical          |
| SRUG_07846     | -             | D            | -            | +             | MnP atypical          |
| SRUG_07847     | -             | D            | -            | +             | MnP atypical          |
| SRUG_07849     | -             | D            | -            | +             | MnP atypical          |
| SRUG_07850     | -             | D            | -            | +             | MnP atypical          |
| SRUG_07851     | -             | D            | -            | +             | MnP atypical          |
| SRUG_08480     | -             | +            | -            | -             | MnP atypical          |
| SRUG_09291     | -             | +            | -            | +             | MnP atypical          |
| SRUG_09292     | -             | +            | -            | +             | MnP atypical          |
| SRUG_09293     | -             | +            | -            | +             | MnP atypical          |
| SRUG_09779     | -             | D            | -            | +             | MnP atypical          |
| SRUG_09835     | -             | D            | -            | +             | MnP atypical          |
| SRUG_10902     | -             | -            | -            | +             | MnP atypical          |

**Table S11 Putative peroxidase-encoding genes of *Stropharia rugosoannulata***

| Gene ID    | Classification                           | Gene expression |          | secretory protein |   |
|------------|------------------------------------------|-----------------|----------|-------------------|---|
| SRUG_01340 | Haloperoxidase(haem)                     | 0               | 0        | 0                 | Y |
| SRUG_01341 | Haloperoxidase(haem)                     | 0               | 0        | 0                 | Y |
| SRUG_01346 | Haloperoxidase(haem)                     | 0               | 0.051446 | 0                 | Y |
| SRUG_02748 | Haloperoxidase(haem)                     | 2.650975        | 1.244453 | 6.433436          | N |
| SRUG_06741 | Haloperoxidase(haem)                     | 34.16175        | 20.35598 | 22.5075           | Y |
| SRUG_06742 | Haloperoxidase(haem)                     | 0.090192        | 0.105197 | 0.2741            | Y |
| SRUG_06743 | Haloperoxidase(haem)                     | 0.102564        | 0.105836 | 0.054406          | Y |
| SRUG_09264 | Haloperoxidase(haem)                     | 0.033723        | 0        | 0                 | Y |
| SRUG_09697 | Haloperoxidase(haem)                     | 100.6336        | 150.6177 | 106.1437          | N |
| SRUG_09851 | Haloperoxidase(haem)                     | 0               | 0.151478 | 0.178881          | Y |
| SRUG_10620 | Haloperoxidase(haem)                     | 9.229263        | 8.807705 | 4.983132          | Y |
| SRUG_10678 | Haloperoxidase(haem)                     | 34.3484         | 46.3467  | 38.22605          | N |
| SRUG_11079 | Haloperoxidase(haem)                     | 4.528346        | 3.706427 | 8.901436          | N |
| SRUG_02749 | Haloperoxidase(haem)                     | 0               | 0.322391 | 0                 | N |
| SRUG_00066 | Linoleate diol synthase                  | 7.362726        | 11.05866 | 8.1958            | N |
| SRUG_05824 | Linoleate diol synthase                  | 4.074601        | 9.285253 | 5.951723          | N |
| SRUG_06857 | Linoleate diol synthase                  | 13.65838        | 30.18056 | 20.8284           | N |
| SRUG_08651 | Linoleate diol synthase                  | 127.2217        | 132.7035 | 376.1703          | N |
| SRUG_06581 | Catalase                                 | 15.82494        | 19.61318 | 23.73195          | N |
| SRUG_01177 | Cytochrome-c peroxidase                  | 76.43199        | 80.94376 | 74.81068          | N |
| SRUG_08269 | DyP-type peroxidase D                    | 20.09621        | 22.44544 | 54.79304          | N |
| SRUG_03814 | Hybrid Ascorbate-Cytochrome C peroxidase | 0.995445        | 2.164737 | 1.316597          | Y |
| SRUG_02817 | Hybrid Ascorbate-Cytochrome C peroxidase | 322.7769        | 405.7787 | 222.0444          | Y |
| SRUG_04040 | Hybrid Ascorbate-Cytochrome C peroxidase | 0               | 0.037536 | 0.039402          | Y |

|            |                                          |          |          |          |   |
|------------|------------------------------------------|----------|----------|----------|---|
| SRUG_04753 | Hybrid Ascorbate-Cytochrome C peroxidase | 0.040854 | 0.063005 | 0        | Y |
| SRUG_06801 | Hybrid Ascorbate-Cytochrome C peroxidase | 0.905026 | 1.007475 | 2.030694 | Y |
| SRUG_07015 | Hybrid Ascorbate-Cytochrome C peroxidase | 12.11928 | 22.69461 | 16.07476 | Y |
| SRUG_07017 | Hybrid Ascorbate-Cytochrome C peroxidase | 0        | 0        | 0.02872  | Y |
| SRUG_07052 | Hybrid Ascorbate-Cytochrome C peroxidase | 12.26524 | 17.4184  | 15.09075 | Y |
| SRUG_08368 | Hybrid Ascorbate-Cytochrome C peroxidase | 18.48481 | 29.51112 | 22.87286 | Y |
| SRUG_09055 | Hybrid Ascorbate-Cytochrome C peroxidase | 0.094905 | 0.603982 | 0.730356 | Y |
| SRUG_03862 | Manganese peroxidase                     | 0.159296 | 0.138953 | 0.058596 | Y |
| SRUG_03871 | Manganese peroxidase                     | 21.65204 | 15.61914 | 18.20432 | N |
| SRUG_03872 | Manganese peroxidase                     | 32.80987 | 12.34284 | 41.7977  | Y |
| SRUG_04745 | Manganese peroxidase                     | 0.096936 | 0        | 0        | Y |
| SRUG_07847 | Manganese peroxidase                     | 6.734917 | 29.52272 | 35.65636 | N |
| SRUG_07850 | Manganese peroxidase                     | 70.89768 | 34.65069 | 65.00932 | Y |
| SRUG_07851 | Manganese peroxidase                     | 7.884882 | 8.216792 | 6.24357  | Y |
| SRUG_08480 | Manganese peroxidase                     | 0.593793 | 11.54898 | 1.837162 | N |
| SRUG_09291 | Manganese peroxidase                     | 0        | 0        | 0        | Y |
| SRUG_09292 | Manganese peroxidase                     | 0        | 0        | 0        | Y |
| SRUG_09293 | Manganese peroxidase                     | 0.106754 | 0.739416 | 0        | Y |
| SRUG_09779 | Manganese peroxidase                     | 0.223447 | 1.113872 | 0.204948 | Y |
| SRUG_09835 | Manganese peroxidase                     | 0        | 0.15611  | 0        | Y |
| SRUG_10902 | Manganese peroxidase                     | 11.61757 | 10.51701 | 9.184996 | N |
| SRUG_07844 | Manganese peroxidase                     | 0.235738 | 1.498493 | 0.342125 | Y |
| SRUG_07846 | Manganese peroxidase                     | 25.95676 | 28.84586 | 19.17442 | Y |
| SRUG_07849 | Manganese peroxidase                     | 20.09236 | 35.52051 | 26.72743 | Y |
| SRUG_01647 | NoxA                                     | 1758.868 | 1433.841 | 1889.156 | N |
| SRUG_09509 | NoxB                                     | 184.4253 | 250.9619 | 216.5775 | N |

|            |                                                   |          |          |          |   |
|------------|---------------------------------------------------|----------|----------|----------|---|
| SRUG_00593 | NoxR                                              | 393.837  | 333.0223 | 403.0918 | N |
| SRUG_06711 | Atypical 2-Cysteine peroxiredoxin (typeII, typeV) | 321.418  | 228.841  | 175.491  | N |
| SRUG_08102 | Atypical 3-Cysteine peroxiredoxin (typeII, typeV) | 49.40612 | 46.57563 | 65.07483 | N |
| SRUG_11529 | Atypical 2-Cyste(typeQ, BCP)                      | 4462.049 | 3478.453 | 3798.053 | N |
| SRUG_07277 | Atypical 3-Cyste(typeQ, BCP)                      | 244.0841 | 287.9891 | 319.1688 | N |
| SRUG_06701 | Atypical 4-Cyste(typeQ, BCP)                      | 62.72382 | 41.96613 | 50.8286  | N |
| SRUG_05238 | 1-Cysteine peroxiredoxin (1CysPrx)                | 431.7512 | 747.7196 | 843.8557 | N |
| SRUG_04690 | 1-Cysteine peroxiredoxin (2CysPrx)                | 149.7155 | 302.9699 | 238.3941 | N |
| SRUG_06761 | Carboxymuconolactone decarboxylase                | 40.97107 | 22.10519 | 28.68509 | N |
| SRUG_04254 | Fungi-Bacteria glutathione peroxidase             | 521.6467 | 376.27   | 810.6085 | N |
| SRUG_08181 | Typical 2-Cysteine peroxiredoxin                  | 10.75503 | 27.96025 | 10.66499 | N |

---

**Table S12 The number of CAZyme families in 16 species**

| <b>Specise</b>                   | <b>GT</b> | <b>GH</b> | <b>CE</b> | <b>PL</b> | <b>AA</b> | <b>CBM</b> | <b>Summary</b> |
|----------------------------------|-----------|-----------|-----------|-----------|-----------|------------|----------------|
| <i>Armillaria mellea</i>         | 63        | 209       | 33        | 22        | 103       | 9          | 439            |
| <i>Agaricus bisporus</i>         | 50        | 144       | 18        | 19        | 70        | 4          | 305            |
| <i>Coprinopsis cinerea</i>       | 59        | 153       | 32        | 15        | 81        | 9          | 349            |
| <i>Hypholoma sublateritium</i>   | 61        | 163       | 23        | 8         | 98        | 7          | 360            |
| <i>Lepista nuda</i>              | 62        | 217       | 33        | 24        | 108       | 10         | 454            |
| <i>Lyophyllum atratum</i>        | 67        | 206       | 23        | 13        | 104       | 5          | 418            |
| <i>Lentinula edodes</i>          | 51        | 155       | 10        | 6         | 47        | 5          | 274            |
| <i>Laccaria bicolor</i>          | 54        | 98        | 12        | 6         | 31        | 1          | 202            |
| <i>Moniliophthora roreri</i>     | 62        | 240       | 36        | 23        | 118       | 9          | 488            |
| <i>Pholiota highlandensis</i>    | 63        | 177       | 25        | 10        | 121       | 8          | 404            |
| <i>Psilocybe cubensis</i>        | 58        | 182       | 23        | 8         | 105       | 21         | 397            |
| <i>Pleurotus eryngii</i>         | 57        | 181       | 19        | 24        | 84        | 9          | 374            |
| <i>Pluteus cervinus</i>          | 58        | 167       | 18        | 10        | 78        | 6          | 337            |
| <i>Schizophyllum commune</i>     | 61        | 182       | 19        | 17        | 51        | 3          | 333            |
| <i>Stropharia rugosoannulata</i> | 55        | 165       | 25        | 10        | 107       | 9          | 371            |

**Table S13-1 Comparative analysis of the plant cell wall degradation (PCWD) gene families with 37 fungi — Cellulose**

| Cellulose               |                  |                    |     |     |      |      |       |        |     |     |     |     |              |      |                                        |
|-------------------------|------------------|--------------------|-----|-----|------|------|-------|--------|-----|-----|-----|-----|--------------|------|----------------------------------------|
| Nutritional<br>strategy | Order            | Species<br>acronym |     |     | AA9  |      |       |        | GH3 |     |     |     | AA8<br>cytb6 |      | Total<br>cellulose<br>related<br>genes |
|                         |                  |                    | GH7 | GH6 | LPMO | GH12 | GH5-5 | b-gluc | GH1 | ALE | GH9 | CDH | 52           | AA12 |                                        |
| WR                      | Auriculariales   | Aursu              | 6   | 2   | 19   | 2    | 4     | 12     | 1   | 4   | 0   | 1   | 0            | 0    | 51                                     |
| WR                      | Polyporales      | Bjead              | 5   | 1   | 26   | 2    | 4     | 8      | 2   | 3   | 1   | 1   | 1            | 0    | 54                                     |
| WR                      | Polyporales      | Dicsq              | 3   | 1   | 14   | 3    | 3     | 6      | 4   | 5   | 0   | 1   | 1            | 0    | 41                                     |
| WR                      | Auriculariales   | Exigl              | 6   | 1   | 34   | 2    | 7     | 11     | 1   | 5   | 0   | 1   | 0            | 0    | 68                                     |
| WR                      | Hymenochaetales  | Fomme              | 2   | 2   | 13   | 3    | 3     | 8      | 5   | 3   | 1   | 1   | 0            | 0    | 41                                     |
| WR                      | Polyporales      | Cersu              | 3   | 1   | 9    | 2    | 2     | 5      | 3   | 2   | 0   | 1   | 1            | 0    | 29                                     |
| WR                      | Agaricales       | Gymlu              | 7   | 1   | 12   | 3    | 4     | 12     | 3   | 3   | 1   | 1   | 0            | 0    | 47                                     |
| WR                      | Agaricales       | Galma              | 8   | 3   | 18   | 4    | 7     | 9      | 5   | 5   | 1   | 1   | 0            | 0    | 61                                     |
| WR                      | Polyporales      | Gansp              | 3   | 1   | 15   | 3    | 3     | 8      | 3   | 5   | 1   | 1   | 1            | 0    | 44                                     |
| WR                      | Amylocorticiales | Plicr              | 1   | 2   | 9    | 2    | 2     | 9      | 3   | 5   | 1   | 1   | 1            | 0    | 36                                     |
| WR                      | Polyporales      | Phlbr              | 4   | 1   | 12   | 2    | 4     | 7      | 2   | 3   | 1   | 1   | 1            | 0    | 38                                     |
| WR                      | Corticiales      | Punst              | 5   | 1   | 13   | 2    | 3     | 13     | 1   | 4   | 1   | 1   | 0            | 0    | 44                                     |
| WR                      | Russulales       | Peni               | 3   | 1   | 16   | 4    | 5     | 8      | 1   | 4   | 1   | 1   | 0            | 0    | 44                                     |
| WR                      | Trechisporales   | Sissu              | 3   | 4   | 21   | 3    | 6     | 7      | 1   | 2   | 0   | 2   | 1            | 0    | 50                                     |
| WR                      | Trechisporales   | Sisni              | 3   | 4   | 21   | 2    | 6     | 7      | 1   | 2   | 0   | 2   | 1            | 0    | 49                                     |
| WR                      | Russulales       | Stehi              | 3   | 1   | 16   | 5    | 4     | 14     | 3   | 4   | 1   | 1   | 1            | 0    | 53                                     |
| WR                      | Polyporales      | Trave              | 4   | 1   | 18   | 5    | 3     | 10     | 2   | 3   | 1   | 1   | 1            | 0    | 49                                     |
| LD                      | Agaricales       | Agabi              | 1   | 1   | 10   | 2    | 3     | 5      | 1   | 3   | 1   | 1   | 0            | 0    | 28                                     |



|       |                |           |   |   |    |   |   |    |   |   |   |   |   |   |    |
|-------|----------------|-----------|---|---|----|---|---|----|---|---|---|---|---|---|----|
| LD    | Agaricales     | AGP       | 7 | 3 | 19 | 2 | 5 | 7  | 3 | 4 | 1 | 1 | 0 | 0 | 52 |
| LD    | Agaricales     | Copci     | 6 | 5 | 32 | 0 | 1 | 7  | 2 | 3 | 1 | 1 | 0 | 4 | 62 |
| LD    | Agaricales     | COA       | 5 | 2 | 38 | 0 | 2 | 6  | 2 | 3 | 1 | 1 | 0 | 2 | 62 |
| LD    | Agaricales     | GYC       | 5 | 1 | 10 | 3 | 4 | 11 | 3 | 3 | 1 | 1 | 0 | 0 | 42 |
| LD    | Agaricales     | LEL       | 7 | 2 | 23 | 3 | 4 | 11 | 3 | 4 | 1 | 4 | 0 | 0 | 62 |
| LD    | Agaricales     | PSS       | 7 | 3 | 26 | 5 | 9 | 8  | 4 | 3 | 1 | 1 | 2 | 0 | 69 |
| LD    | Agaricales     | TEN       | 4 | 1 | 14 | 4 | 2 | 18 | 4 | 4 | 1 | 1 | 0 | 0 | 53 |
| LD    | Agaricales     | TRC       | 6 | 2 | 23 | 3 | 2 | 8  | 2 | 3 | 1 | 2 | 0 | 0 | 52 |
| BR    | Dacrymycetales | Calvi     | 0 | 0 | 0  | 1 | 2 | 11 | 1 | 4 | 1 | 0 | 0 | 0 | 20 |
| BR    | Dacrymycetales | Calco     | 0 | 0 | 0  | 1 | 2 | 9  | 1 | 4 | 1 | 0 | 0 | 0 | 18 |
| BR    | Boletales      | Conpu     | 2 | 2 | 10 | 4 | 5 | 10 | 3 | 4 | 1 | 2 | 3 | 0 | 46 |
| BR    | Dacrymycetales | Dacsp     | 0 | 0 | 0  | 1 | 3 | 7  | 1 | 3 | 1 | 0 | 0 | 0 | 16 |
| BR    | Polyporales    | Daequ     | 0 | 0 | 4  | 2 | 2 | 6  | 2 | 3 | 0 | 0 | 0 | 0 | 19 |
| BR    | Polyporales    | Fompi     | 0 | 0 | 4  | 2 | 3 | 9  | 2 | 3 | 0 | 0 | 0 | 0 | 23 |
| BR    | Gloeophyllales | Glotr     | 0 | 0 | 4  | 2 | 2 | 9  | 5 | 4 | 1 | 1 | 0 | 0 | 28 |
| BR    | Boletales      | Hydpi     | 3 | 1 | 14 | 3 | 5 | 11 | 3 | 3 | 1 | 1 | 3 | 0 | 48 |
| BR    | Gloeophyllales | Neole     | 0 | 0 | 3  | 2 | 2 | 7  | 2 | 4 | 1 | 0 | 0 | 0 | 21 |
| BR    | Boletales      | Serla 7.3 | 0 | 1 | 5  | 1 | 3 | 9  | 3 | 3 | 1 | 2 | 2 | 0 | 30 |
| BR    | Polyporales    | Wolco     | 0 | 0 | 2  | 2 | 2 | 6  | 1 | 2 | 0 | 0 | 0 | 0 | 15 |
| LD/WR | Strophariaceae | Strru     | 4 | 1 | 11 | 1 | 3 | 7  | 3 | 2 | 1 | 1 | 1 | 0 | 35 |

**Table S13-2 Comparative analysis of the PCWD gene families with 37 fungi — Hemicellulose**

| Hemicellulose |  |  |  |  |  |  |  |  |  |  |  |  |  |  |  |
|---------------|--|--|--|--|--|--|--|--|--|--|--|--|--|--|--|
|---------------|--|--|--|--|--|--|--|--|--|--|--|--|--|--|--|

|            |                  |         | xylan |    |   |    |    |     |    |    |    | pectin |    |    |    |    |    | mannan |    |    |    | xyloglucan |     |   |     | cutin |    |    |
|------------|------------------|---------|-------|----|---|----|----|-----|----|----|----|--------|----|----|----|----|----|--------|----|----|----|------------|-----|---|-----|-------|----|----|
| Nutritiona |                  | Species | GH    | GH | G | C  | CE | GH  | GH | GH | CE | C      | GH | GH | GH | GH | GH | G      | GH | GH | GH | GH         | GH2 |   |     | Total |    |    |
|            |                  |         |       |    |   |    |    |     |    |    |    |        |    |    |    |    |    |        |    |    |    |            |     |   |     |       | H3 | b- |
| l strategy | Order            | acronym | 10    | 11 | o | E1 | 16 | 115 | 62 | 28 | 12 | E8     | 35 | 53 | 43 | 78 | 88 | 5-7    | H2 | 27 | 74 | 51         | 95  | 9 | CE5 |       |    |    |
| WR         | Auriculariales   | Aursu   | 4     | 3  | 1 | 4  | 31 | 1   | 0  | 10 | 2  | 3      | 6  | 1  | 27 | 4  | 2  | 2      | 7  | 4  | 1  | 3          | 1   | 2 | 3   | 122   |    |    |
| WR         | Polyporales      | Bjead   | 4     | 0  | 0 | 1  | 13 | 2   | 0  | 6  | 1  | 2      | 4  | 1  | 6  | 2  | 1  | 2      | 3  | 3  | 2  | 2          | 1   | 0 | 0   | 56    |    |    |
| WR         | Polyporales      | Dicsq   | 5     | 0  | 1 | 0  | 11 | 2   | 0  | 7  | 2  | 3      | 3  | 1  | 7  | 5  | 1  | 2      | 4  | 6  | 1  | 2          | 1   | 0 | 0   | 64    |    |    |
| WR         | Auriculariales   | Exigl   | 8     | 2  | 1 | 6  | 29 | 2   | 2  | 12 | 4  | 4      | 7  | 1  | 22 | 6  | 3  | 2      | 6  | 10 | 1  | 4          | 1   | 3 | 2   | 138   |    |    |
| WR         | Hymenochaetales  | Fomme   | 4     | 0  | 0 | 0  | 6  | 3   | 0  | 14 | 2  | 3      | 2  | 1  | 6  | 2  | 2  | 2      | 2  | 4  | 4  | 1          | 2   | 0 | 0   | 60    |    |    |
| WR         | Polyporales      | Cersu   | 6     | 1  | 0 | 1  | 7  | 2   | 0  | 6  | 0  | 2      | 1  | 5  | 2  | 1  | 1  | 2      | 4  | 4  | 1  | 2          | 1   | 0 | 0   | 49    |    |    |
| WR         | Agaricales       | Gymlu   | 5     | 4  | 2 | 5  | 12 | 1   | 1  | 19 | 3  | 6      | 5  | 1  | 9  | 3  | 1  | 5      | 4  | 6  | 1  | 5          | 2   | 1 | 3   | 104   |    |    |
| WR         | Agaricales       | Galma   | 8     | 8  | 1 | 2  | 10 | 1   | 1  | 17 | 4  | 3      | 9  | 3  | 4  | 1  | 1  | 8      | 3  | 8  | 2  | 5          | 2   | 1 | 6   | 108   |    |    |
| WR         | Polyporales      | Gansp   | 8     | 0  | 4 | 2  | 17 | 2   | 0  | 10 | 1  | 2      | 6  | 1  | 11 | 4  | 1  | 2      | 3  | 3  | 1  | 2          | 2   | 0 | 0   | 82    |    |    |
| WR         | Amylocorticiales | Plicr   | 2     | 0  | 0 | 4  | 11 | 1   | 0  | 10 | 0  | 3      | 2  | 0  | 3  | 3  | 1  | 2      | 4  | 2  | 1  | 2          | 2   | 1 | 0   | 54    |    |    |
| WR         | Polyporales      | Phlbr   | 8     | 0  | 0 | 1  | 8  | 2   | 0  | 5  | 0  | 3      | 4  | 1  | 1  | 1  | 1  | 2      | 2  | 2  | 1  | 1          | 2   | 1 | 1   | 47    |    |    |
| WR         | Corticiales      | Punst   | 5     | 1  | 0 | 2  | 12 | 1   | 0  | 12 | 1  | 6      | 4  | 2  | 7  | 7  | 1  | 1      | 4  | 5  | 2  | 3          | 1   | 1 | 1   | 79    |    |    |
| WR         | Russulales       | Peni    | 6     | 1  | 1 | 2  | 12 | 1   | 0  | 13 | 4  | 4      | 5  | 1  | 19 | 2  | 1  | 2      | 2  | 5  | 1  | 4          | 3   | 2 | 3   | 94    |    |    |
| WR         | Trechisporales   | Sissu   | 5     | 2  | 0 | 3  | 4  | 2   | 0  | 2  | 0  | 0      | 1  | 0  | 2  | 0  | 0  | 3      | 2  | 1  | 2  | 1          | 1   | 0 | 2   | 33    |    |    |
| WR         | Trechisporales   | Sisni   | 5     | 2  | 0 | 3  | 5  | 2   | 0  | 2  | 0  | 0      | 1  | 0  | 2  | 0  | 0  | 5      | 2  | 1  | 2  | 1          | 1   | 0 | 2   | 36    |    |    |
| WR         | Russulales       | Stehi   | 6     | 1  | 2 | 1  | 11 | 2   | 0  | 17 | 3  | 4      | 7  | 2  | 10 | 3  | 1  | 1      | 3  | 5  | 2  | 3          | 1   | 4 | 1   | 90    |    |    |
| WR         | Polyporales      | Trave   | 6     | 0  | 2 | 3  | 7  | 2   | 0  | 9  | 0  | 2      | 2  | 1  | 3  | 3  | 1  | 2      | 5  | 4  | 1  | 2          | 1   | 0 | 0   | 56    |    |    |
|            |                  |         |       |    |   |    |    |     |    |    |    |        |    |    |    |    |    |        |    |    |    |            |     |   |     |       |    |    |
| LD         | Agaricales       | Agabi   | 2     | 2  | 2 | 1  | 11 | 2   | 0  | 5  | 2  | 2      | 1  | 1  | 4  | 4  | 1  | 1      | 2  | 4  | 1  | 1          | 1   | 1 | 6   | 57    |    |    |
| LD         | Agaricales       | AGP     | 8     | 3  | 1 | 2  | 6  | 1   | 2  | 7  | 2  | 3      | 4  | 1  | 3  | 1  | 1  | 3      | 2  | 4  | 1  | 3          | 1   | 0 | 4   | 63    |    |    |

|       |                |           |    |    |   |   |    |   |   |    |   |   |   |   |    |   |   |   |   |   |   |   |   |   |    |     |  |
|-------|----------------|-----------|----|----|---|---|----|---|---|----|---|---|---|---|----|---|---|---|---|---|---|---|---|---|----|-----|--|
| LD    | Agaricales     | Copci     | 5  | 6  | 0 | 3 | 5  | 1 | 3 | 3  | 1 | 0 | 0 | 1 | 4  | 0 | 1 | 2 | 2 | 0 | 1 | 1 | 0 | 0 | 6  | 45  |  |
| LD    | Agaricales     | COA       | 18 | 5  | 1 | 5 | 3  | 1 | 1 | 4  | 1 | 0 | 2 | 1 | 5  | 0 | 1 | 3 | 2 | 1 | 1 | 1 | 0 | 0 | 2  | 58  |  |
| LD    | Agaricales     | GYC       | 3  | 3  | 2 | 2 | 3  | 1 | 1 | 15 | 5 | 8 | 3 | 1 | 8  | 2 | 1 | 4 | 4 | 5 | 1 | 4 | 2 | 1 | 6  | 85  |  |
| LD    | Agaricales     | LEL       | 5  | 1  | 2 | 1 | 5  | 2 | 1 | 7  | 3 | 4 | 5 | 2 | 9  | 4 | 1 | 4 | 3 | 8 | 1 | 2 | 2 | 1 | 4  | 77  |  |
| LD    | Agaricales     | PSS       | 10 | 12 | 1 | 5 | 5  | 1 | 4 | 7  | 1 | 5 | 4 | 1 | 10 | 1 | 1 | 7 | 2 | 6 | 1 | 4 | 2 | 0 | 10 | 100 |  |
| LD    | Agaricales     | TEN       | 5  | 3  | 2 | 2 | 13 | 2 | 1 | 14 | 4 | 7 | 7 | 1 | 8  | 3 | 1 | 2 | 4 | 5 | 1 | 4 | 3 | 3 | 5  | 100 |  |
| LD    | Agaricales     | TRC       | 3  | 0  | 1 | 2 | 3  | 2 | 0 | 6  | 2 | 2 | 5 | 1 | 7  | 3 | 1 | 3 | 3 | 5 | 1 | 4 | 1 | 1 | 5  | 61  |  |
|       |                |           |    |    |   |   |    |   |   |    |   |   |   |   |    |   |   |   |   |   |   |   |   |   |    |     |  |
| BR    | Dacrymycetales | Calvi     | 2  | 1  | 1 | 0 | 4  | 2 | 0 | 6  | 0 | 2 | 1 | 1 | 4  | 0 | 2 | 2 | 4 | 2 | 0 | 2 | 0 | 2 | 0  | 38  |  |
| BR    | Dacrymycetales | Calco     | 2  | 2  | 1 | 0 | 5  | 2 | 0 | 7  | 0 | 2 | 1 | 1 | 4  | 0 | 1 | 2 | 1 | 2 | 0 | 2 | 0 | 2 | 0  | 37  |  |
| BR    | Boletales      | Conpu     | 3  | 0  | 2 | 0 | 7  | 2 | 0 | 13 | 0 | 2 | 2 | 1 | 6  | 2 | 1 | 2 | 5 | 3 | 0 | 3 | 1 | 4 | 1  | 60  |  |
| BR    | Dacrymycetales | Dacsp     | 3  | 0  | 1 | 0 | 4  | 2 | 0 | 6  | 0 | 2 | 1 | 1 | 5  | 0 | 1 | 2 | 3 | 2 | 0 | 2 | 0 | 2 | 0  | 37  |  |
| BR    | Polyporales    | Daequ     | 3  | 0  | 2 | 1 | 7  | 1 | 0 | 8  | 0 | 1 | 1 | 1 | 3  | 3 | 1 | 2 | 3 | 3 | 0 | 1 | 1 | 0 | 0  | 42  |  |
| BR    | Polyporales    | Fompi     | 3  | 0  | 2 | 0 | 9  | 1 | 0 | 12 | 0 | 2 | 2 | 1 | 7  | 3 | 1 | 2 | 4 | 4 | 0 | 3 | 1 | 0 | 0  | 57  |  |
| BR    | Gloeophyllales | Glotr     | 3  | 0  | 1 | 1 | 7  | 2 | 0 | 10 | 0 | 2 | 2 | 2 | 5  | 2 | 1 | 2 | 4 | 3 | 1 | 3 | 1 | 1 | 0  | 53  |  |
| BR    | Boletales      | Hydpi     | 3  | 0  | 1 | 1 | 10 | 1 | 0 | 9  | 0 | 2 | 2 | 1 | 2  | 2 | 1 | 3 | 3 | 6 | 1 | 1 | 1 | 1 | 0  | 51  |  |
| BR    | Gloeophyllales | Neole     | 2  | 0  | 1 | 0 | 3  | 1 | 0 | 10 | 0 | 2 | 2 | 1 | 4  | 1 | 1 | 2 | 3 | 3 | 1 | 3 | 1 | 1 | 0  | 42  |  |
| BR    | Boletales      | Serla 7.3 | 1  | 0  | 1 | 0 | 3  | 1 | 0 | 7  | 0 | 2 | 3 | 1 | 1  | 2 | 1 | 4 | 3 | 3 | 1 | 1 | 1 | 1 | 0  | 37  |  |
| BR    | Polyporales    | Wolco     | 4  | 0  | 1 | 0 | 5  | 2 | 0 | 9  | 0 | 1 | 2 | 1 | 1  | 3 | 1 | 2 | 3 | 3 | 0 | 4 | 1 | 0 | 0  | 43  |  |
|       |                |           |    |    |   |   |    |   |   |    |   |   |   |   |    |   |   |   |   |   |   |   |   |   |    |     |  |
| LD/WR | Strophariaceae | Strru     | 4  | 1  | 1 | 3 | 4  | 1 | 0 | 8  | 1 | 4 | 3 | 1 | 4  | 2 | 1 | 2 | 3 | 2 | 1 | 8 | 2 | 0 | 5  | 61  |  |

**Table S13-3 Comparative analysis of the PCWD gene families with 37 fungi — Lignin and xenobiotics**

**Lignin and xenobiotics**

| Nutritional strategy | Order            | Species acronym | AA2<br>ligninolytic<br>POD | AA1<br>Lac<br>and<br>Lac-<br>like |     |            |                     |                                 |   |                     |             | Total lignin<br>and<br>xenobiotics<br>related<br>genes |     | Total<br>copies<br>per<br>species |
|----------------------|------------------|-----------------|----------------------------|-----------------------------------|-----|------------|---------------------|---------------------------------|---|---------------------|-------------|--------------------------------------------------------|-----|-----------------------------------|
|                      |                  |                 |                            | DyP                               | HTP | AA5<br>GLX | AA5<br>CRO<br>other | AA3_2<br>GMC<br>PDH,GO,<br>AAOX |   | AA3_3<br>GMC<br>MOX | AA3_4<br>PO |                                                        |     |                                   |
|                      |                  |                 |                            |                                   |     |            |                     |                                 |   |                     |             |                                                        |     |                                   |
| WR                   | Auriculariales   | Aursu           | 5                          | 6                                 | 11  | 16         | 2                   | 6                               | 5 | 33                  | 3           | 87                                                     | 260 |                                   |
| WR                   | Polyporales      | Bjead           | 18                         | 1                                 | 11  | 4          | 1                   | 5                               | 7 | 28                  | 1           | 76                                                     | 186 |                                   |
| WR                   | Polyporales      | Dicsq           | 12                         | 13                                | 1   | 4          | 5                   | 4                               | 4 | 29                  | 0           | 72                                                     | 177 |                                   |
| WR                   | Auriculariales   | Exigl           | 13                         | 7                                 | 8   | 32         | 2                   | 6                               | 5 | 34                  | 4           | 111                                                    | 317 |                                   |
| WR                   | Hymenochaetales  | Fomme           | 16                         | 10                                | 3   | 4          | 0                   | 4                               | 3 | 22                  | 0           | 62                                                     | 163 |                                   |
| WR                   | Polyporales      | Cersu           | 14                         | 8                                 | 0   | 9          | 0                   | 3                               | 4 | 17                  | 0           | 55                                                     | 133 |                                   |
| WR                   | Agaricales       | Gymlu           | 5                          | 17                                | 12  | 17         | 5                   | 5                               | 9 | 48                  | 0           | 118                                                    | 269 |                                   |
| WR                   | Agaricales       | Galma           | 17                         | 8                                 | 5   | 24         | 4                   | 12                              | 4 | 31                  | 0           | 105                                                    | 274 |                                   |
| WR                   | Polyporales      | Gansp           | 8                          | 16                                | 3   | 4          | 5                   | 4                               | 5 | 28                  | 0           | 73                                                     | 199 |                                   |
| WR                   | Amylocorticiales | Plicr           | 6                          | 5                                 | 0   | 3          | 0                   | 5                               | 4 | 14                  | 0           | 37                                                     | 127 |                                   |
| WR                   | Polyporales      | Phlbr           | 13                         | 8                                 | 3   | 3          | 1                   | 6                               | 6 | 31                  | 1           | 72                                                     | 157 |                                   |
| WR                   | Corticiales      | Punst           | 10                         | 12                                | 5   | 8          | 3                   | 6                               | 4 | 17                  | 1           | 66                                                     | 189 |                                   |
| WR                   | Russulales       | Peni            | 14                         | 21                                | 0   | 2          | 1                   | 6                               | 2 | 32                  | 1           | 79                                                     | 217 |                                   |
| WR                   | Trechisporales   | Sissu           | 14                         | 13                                | 0   | 35         | 0                   | 6                               | 1 | 22                  | 2           | 93                                                     | 176 |                                   |
| WR                   | Trechisporales   | Sisni           | 14                         | 13                                | 0   | 35         | 0                   | 6                               | 1 | 21                  | 2           | 92                                                     | 177 |                                   |
| WR                   | Russulales       | Stehi           | 5                          | 18                                | 2   | 9          | 3                   | 5                               | 7 | 41                  | 0           | 90                                                     | 233 |                                   |
| WR                   | Polyporales      | Trave           | 25                         | 8                                 | 2   | 3          | 5                   | 4                               | 4 | 18                  | 1           | 70                                                     | 175 |                                   |
| LD                   | Agaricales       | Agabi           | 2                          | 11                                | 0   | 24         | 3                   | 6                               | 4 | 29                  | 0           | 79                                                     | 164 |                                   |
| LD                   | Agaricales       | AGP             | 7                          | 11                                | 2   | 4          | 3                   | 11                              | 4 | 24                  | 0           | 66                                                     | 181 |                                   |
| LD                   | Agaricales       | Copci           | 0                          | 17                                | 3   | 8          | 0                   | 6                               | 2 | 32                  | 0           | 68                                                     | 175 |                                   |

|    |            |     |   |    |    |    |   |    |   |    |   |     |     |
|----|------------|-----|---|----|----|----|---|----|---|----|---|-----|-----|
| LD | Agaricales | COA | 0 | 15 | 1  | 14 | 0 | 6  | 2 | 30 | 0 | 68  | 188 |
| LD | Agaricales | GYC | 6 | 21 | 14 | 18 | 2 | 4  | 5 | 31 | 0 | 101 | 228 |
| LD | Agaricales | LEL | 2 | 19 | 1  | 11 | 5 | 6  | 2 | 56 | 0 | 102 | 241 |
| LD | Agaricales | PSS | 9 | 7  | 3  | 13 | 5 | 8  | 4 | 28 | 0 | 77  | 246 |
| LD | Agaricales | TEN | 9 | 22 | 7  | 27 | 9 | 22 | 7 | 70 | 1 | 174 | 327 |
| LD | Agaricales | TRC | 1 | 24 | 1  | 4  | 1 | 5  | 1 | 16 | 0 | 53  | 166 |

|    |                |           |   |    |   |   |   |   |   |    |   |    |     |
|----|----------------|-----------|---|----|---|---|---|---|---|----|---|----|-----|
| BR | Dacrymycetales | Calvi     | 0 | 6  | 0 | 6 | 0 | 3 | 1 | 9  | 0 | 25 | 83  |
| BR | Dacrymycetales | Calco     | 0 | 3  | 0 | 7 | 0 | 3 | 2 | 13 | 0 | 28 | 83  |
| BR | Boletales      | Conpu     | 0 | 7  | 0 | 2 | 0 | 6 | 4 | 15 | 0 | 34 | 140 |
| BR | Dacrymycetales | Dacsp     | 0 | 3  | 0 | 6 | 0 | 3 | 1 | 8  | 0 | 21 | 74  |
| BR | Polyporales    | Daequ     | 0 | 4  | 0 | 4 | 0 | 2 | 4 | 13 | 0 | 27 | 88  |
| BR | Polyporales    | Fompi     | 0 | 6  | 0 | 4 | 0 | 3 | 5 | 22 | 0 | 40 | 120 |
| BR | Gloeophyllales | Glotr     | 0 | 4  | 0 | 6 | 0 | 2 | 2 | 20 | 1 | 35 | 116 |
| BR | Boletales      | Hydpi     | 0 | 10 | 1 | 4 | 0 | 5 | 4 | 7  | 1 | 32 | 131 |
| BR | Gloeophyllales | Neole     | 0 | 4  | 0 | 9 | 0 | 2 | 3 | 21 | 0 | 39 | 102 |
| BR | Boletales      | Serla 7.3 | 0 | 5  | 0 | 3 | 0 | 3 | 5 | 7  | 0 | 23 | 90  |
| BR | Polyporales    | Wolco     | 0 | 4  | 0 | 5 | 0 | 4 | 5 | 9  | 0 | 27 | 85  |

|       |                |       |    |    |   |    |    |   |   |    |   |    |     |
|-------|----------------|-------|----|----|---|----|----|---|---|----|---|----|-----|
| LD/WR | Strophariaceae | Strru | 17 | 10 | 1 | 14 | 10 | 1 | 8 | 37 | 0 | 98 | 194 |
|-------|----------------|-------|----|----|---|----|----|---|---|----|---|----|-----|

Aursu: *Auricularia subglabra*; Bjead: *Bjearkandera adusta*; Dicsq: *Dichomitus squalens*; Exigl: *Exidia glandulosa*; Fomme: *Fomitiporia mediterranea*; Cersu: *Gelatopria subvermispora*; Gymllu: *Gymnopus luxurians*; Galma: *Galerina marginata*; Gansp: *Ganoderma* sp.; Plicr: *Plicaturposia crispa*; Phlbr: *Phlebia brevispora*; Punst: *Punctularia strigoso-zonata*; Peni: *Peniophora* sp.; Sissu: *Sistotremastrum suecicum*; Sisni: *Sistotremastrum niveocreum*; Stehi: *Stereum hirsutum*; Trave: *Trametes versicolor*; Agabi: *Agaricus bisporus* var. *bisporus*; AGP: *Agrocybe pediades*; Copci: *Coprinopsis cinerea*; COA: *Coprinellus angulatus*; GYC: *Gymnopus confluens*; LEL: *Leucoagaricus leucothites*; PSS: *Psilocybe* cf. *subviscida*; TEN: *Tetrapyrgos nigripes*; TRC: *Tricholomella constricta*; Calvi: *Calocera viscosa*; Calco: *Calocera cornea*; Conpu: *Coniophora puteana*; Dacsp: *Dacryopinax spathulata*; Daequ: *Daedalea quercina*; Fompi: *Fomitopsis pinicola*; Glotr: *Gloeophyllum trabeum*; Hydpi: *Hydnomeruliu pinastris*; Neole: *Neolentinus lepideus*; Serla 7.3: *Serpula lacrymans*; Wolco: *Wolfiporia cocos*; Strru: *Stropharia rugosoannulata*

**Table S14-1 Variables Failing Tolerance Test**

|                        | <b>Within-Groups<br/>Variance</b> | <b>Tolerance</b> | <b>Minimum<br/>Tolerance</b> |
|------------------------|-----------------------------------|------------------|------------------------------|
| CE5                    | 2.442                             | 0.000            | 0.000                        |
| AA2 ligninolytic POD   | 16.986                            | 0.000            | 0.000                        |
| AA1 Lac and Lac-like   | 21.923                            | 0.000            | 0.000                        |
| DyP                    | 12.85                             | 0.000            | 0.000                        |
| HTP                    | 83.563                            | 0.000            | 0.000                        |
| AA5 GLX                | 3.864                             | 0.000            | 0.000                        |
| AA5 CRO other          | 9.47                              | 0.000            | 0.000                        |
| AA3_3GMC MOX           | 3.604                             | 0.000            | 0.000                        |
| AA3_2 GMC PDH,GO, AAOX | 115.527                           | 0.000            | 0.000                        |
| AA3_4 PO               | 0.749                             | 0.000            | 0.000                        |

All variables passing the tolerance criteria are entered simultaneously.

a. Minimum tolerance level is .001.

**Table S14-2 Classification function coefficients resulting from discriminant analysis obtained from PCWD characters**

|                                        | Classification Function Coefficients |          |          |
|----------------------------------------|--------------------------------------|----------|----------|
|                                        | BR                                   | LD       | WR       |
| GH7                                    | 21.505                               | -121.525 | -29.628  |
| GH6                                    | -104.222                             | 244.885  | 17.089   |
| AA9 LPMO                               | -12.887                              | 35.998   | 2.238    |
| GH12                                   | 10.678                               | 202.69   | 105.75   |
| GH5-5                                  | 53.545                               | -74.52   | 6.064    |
| GH3      b-gluc                        | 18.464                               | -53.72   | -16.901  |
| GH1                                    | -35.09                               | 39.184   | -41.726  |
| ALE                                    | 82.83                                | -92.059  | 54.707   |
| GH9                                    | -91.465                              | 75.512   | -52.679  |
| CDH                                    | -16.862                              | 173.085  | 66.933   |
| AA8 cytb652                            | 51.006                               | -222.112 | -28.949  |
| AA12                                   | 122.179                              | 63.105   | 127.942  |
| GH10                                   | -3.115                               | 23.333   | 5.792    |
| GH11                                   | -33.087                              | -32.848  | -36.6    |
| GH3      b-xylo                        | -56.661                              | 118.358  | -31.206  |
| CE1                                    | 24.026                               | -57.162  | 17.712   |
| CE16                                   | -3.083                               | 65.9     | 24.241   |
| GH115                                  | 72.131                               | -196.624 | 35.503   |
| GH62                                   | 14.025                               | -191.225 | -63.856  |
| GH28                                   | 16.254                               | -46.295  | 5.287    |
| CE12                                   | -5.513                               | -90.499  | -28.487  |
| CE8                                    | -55.672                              | 316.139  | 94.223   |
| GH35                                   | -4.233                               | -25.553  | 8.533    |
| GH53                                   | 35.532                               | 12.378   | 43.073   |
| GH43                                   | 6.341                                | -40.861  | -10.546  |
| GH78                                   | 12.607                               | -65.157  | -25.489  |
| GH88                                   | -21.523                              | 365.725  | 87.295   |
| GH5-7                                  | 48.952                               | 81.61    | 62.867   |
| GH2                                    | -2.749                               | -120.508 | -38.858  |
| GH27                                   | -33.739                              | -0.087   | -31.123  |
| GH74                                   | 47.841                               | -84.204  | 6.82     |
| GH51                                   | -9.407                               | 124.047  | 8.809    |
| GH95                                   | 13.514                               | -214.703 | -87.56   |
| GH29                                   | -24.64                               | 11.537   | -50.174  |
| (Constant)                             | -245.397                             | -374.766 | -323.187 |
| Fisher's linear discriminant functions |                                      |          |          |

**Table S14-3 Classification results<sup>a</sup>**

|                                                          |       |                      | Predicted Group |     |     | Total |
|----------------------------------------------------------|-------|----------------------|-----------------|-----|-----|-------|
|                                                          |       |                      | Membership      |     |     |       |
|                                                          |       |                      | BR              | LD  | WR  |       |
| Original                                                 | Count | BR                   | 11              | 0   | 0   | 11    |
|                                                          |       | LD                   | 0               | 9   | 0   | 9     |
|                                                          |       | WR                   | 0               | 0   | 17  | 17    |
|                                                          |       | Ungrouped cases (SR) | 0               | 1   | 0   | 1     |
|                                                          | %     | BR                   | 100             | 0   | 0   | 100   |
|                                                          |       | LD                   | 0               | 100 | 0   | 100   |
|                                                          |       | WR                   | 0               | 0   | 100 | 100   |
|                                                          |       | Ungrouped cases (SR) | 0               | 100 | 0   | 100   |
| a.100.0% of original grouped cases correctly classified. |       |                      |                 |     |     |       |



**Table S15 The gene clusters of *Stropharia rugosoannulata* predicted by antiSMASH**

| Region      | Type            | From      | To        |
|-------------|-----------------|-----------|-----------|
| Region 1.1  | NRPS-like       | 4,035,697 | 4,079,731 |
| Region 2.1  | NRPS-like       | 338,290   | 388,136   |
| Region 2.2  | NRPS-like       | 408,253   | 464,478   |
| Region 2.3  | siderophore     | 3,397,577 | 3,409,795 |
| Region 3.1  | terpene         | 666,283   | 687,725   |
| Region 3.2  | NRPS            | 1,783,703 | 1,831,735 |
| Region 4.1  | siderophore     | 1,960,289 | 1,972,449 |
| Region 4.2  | terpene         | 2,395,330 | 2,416,595 |
| Region 4.3  | NRPS-like       | 3,572,551 | 3,616,679 |
| Region 5.1  | terpene         | 1,053,109 | 1,074,431 |
| Region 6.1  | terpene         | 340,380   | 355,479   |
| Region 6.2  | terpene         | 647,505   | 679,621   |
| Region 6.3  | terpene         | 2,077,902 | 2,099,118 |
| Region 7.1  | terpene         | 465,221   | 485,608   |
| Region 7.2  | NRPS-like       | 1,626,863 | 1,674,587 |
| Region 7.3  | terpene         | 2,536,998 | 2,555,968 |
| Region 7.4  | terpene         | 2,567,855 | 2,589,139 |
| Region 8.1  | NRPS-like       | 239,884   | 283,810   |
| Region 8.2  | terpene         | 1,148,201 | 1,164,861 |
| Region 8.3  | terpene         | 2,224,009 | 2,245,487 |
| Region 8.4  | T1PKS           | 2,256,646 | 2,303,282 |
| Region 9.1  | NRPS-like       | 233,391   | 255,448   |
| Region 9.2  | terpene         | 1,580,441 | 1,600,518 |
| Region 9.3  | terpene         | 2,160,936 | 2,182,205 |
| Region 9.4  | NRPS-like,T1PKS | 2,562,731 | 2,610,976 |
| Region 10.1 | NRPS-like       | 2,251,608 | 2,297,150 |
| Region 10.2 | terpene         | 2,384,642 | 2,406,483 |
| Region 11.1 | NRPS-like       | 1,656,079 | 1,700,094 |
| Region 12.1 | indole          | 679,975   | 698,519   |
| Region 12.2 | terpene         | 1,482,858 | 1,503,883 |
| Region 12.3 | indole          | 1,656,043 | 1,677,263 |
| Region 12.4 | NRPS-like       | 2,124,080 | 2,168,664 |
| Region 15.1 | terpene         | 1,153,025 | 1,174,185 |
| Region 16.1 | indole          | 513,075   | 534,267   |

**Table S16 The number of gene clusters predicted by antiSMASH**

| Species name                   | NRPS |      |         |             |       |        |        | total |
|--------------------------------|------|------|---------|-------------|-------|--------|--------|-------|
|                                | like | NRPS | terpene | siderophore | T1PKS | indole | others |       |
| <i>Agrocybe praecox</i>        | 8    | 1    | 12      | 1           | 2     | 2      | 2      | 28    |
| <i>Armillaria mellea</i>       | 13   | 1    | 22      | 2           | 4     | 0      | 4      | 46    |
| <i>Agaricus bisporus</i>       | 6    | 0    | 10      | 1           | 1     | 2      | 0      | 20    |
| <i>Coprinopsis cinerea</i>     | 2    | 1    | 9       | 1           | 2     | 1      | 0      | 16    |
| <i>Ganoderma sinense</i>       | 9    | 1    | 20      | 0           | 3     | 0      | 1      | 34    |
| <i>Hypholoma sublateritium</i> | 5    | 1    | 12      | 1           | 1     | 0      | 2      | 22    |
| <i>Lyophyllum atratum</i>      | 9    | 0    | 10      | 1           | 1     | 1      | 0      | 22    |
| <i>Lepista nuda</i>            | 12   | 1    | 24      | 1           | 2     | 1      | 5      | 46    |
| <i>Lentinula edodes</i>        | 5    | 2    | 10      | 0           | 4     | 0      | 0      | 21    |
| <i>Moniliophthora roreri</i>   | 10   | 2    | 24      | 0           | 9     | 3      | 1      | 39    |
| <i>Pholiota highlandensis</i>  | 10   | 0    | 14      | 1           | 3     | 2      | 2      | 32    |
| <i>Psilocybe cubensis</i>      | 6    | 1    | 21      | 1           | 1     | 0      | 2      | 32    |
| <i>Pholiota alnicola</i>       | 11   | 0    | 22      | 1           | 2     | 0      | 2      | 38    |
| <i>Pleurotus eryngii</i>       | 4    | 0    | 12      | 1           | 0     | 0      | 3      | 20    |
| <i>Pluteus cervinus</i>        | 5    | 1    | 13      | 1           | 1     | 0      | 0      | 21    |
| <i>Schizophyllum commune</i>   | 5    | 4    | 5       | 0           | 1     | 0      | 1      | 16    |
| <i>Stropharia</i>              |      |      |         |             |       |        |        |       |
| <i>rugosoannulata</i>          | 10   | 1    | 16      | 2           | 1     | 3      | 1      | 34    |

**Table S17 NRPS gene cluster responsible for coprinoferrin in *Coprinopsis cinerea*, *Stropharia rugosoannulata* and *Hypholoma sublateritium***

| Gene ID    | Proposed protein function                              | Homologous Gene ID | Identity (%) | E-value   | Homologous Gene ID | Identity (%) | E-value   |
|------------|--------------------------------------------------------|--------------------|--------------|-----------|--------------------|--------------|-----------|
| CC1G_04201 | Papain inhibitor                                       | SRUG_03244         | 44.44        | 4.00E-57  | HYPSUDRAFT_630361  | 60.63        | 3.00E-111 |
| CC1G_04202 | Secretory carrier-associated membrane protein          | SRUG_03245         | 50.22        | 6.00E-72  | HYPSUDRAFT_179320  | 79.1         | 3.00E-137 |
| CC1G_04203 | Polyadenylate-binding protein                          | SRUG_03246         | 76.08        | 0         | HYPSUDRAFT_35211   | 91.52        | 0         |
| CC1G_04204 | Methyltransferases lae 1                               | SRUG_03247         | 77.42        | 4.00E-51  | HYPSUDRAFT_198131  | 83.39        | 0         |
| CC1G_04205 | Transcription elongation factor spt6                   | SRUG_03248         | 44.62        | 2.00E-26  | HYPSUDRAFT_35206   | 73.15        | 1.00E-49  |
| CC1G_04207 | Transcription factor SPT8                              | SRUG_03249         | 50.87        | 2.00E-95  | HYPSUDRAFT_35205   | 71.46        | 0         |
| CC1G_04208 | Transcription elongation factor SPT6                   | SRUG_03250         | 61.75        | 0         | HYPSUDRAFT_35204   | 82.55        | 0         |
| CC1G_04209 | Diaminohydroxyphosphoribosylamino-pyrimidine deaminase | SRUG_03251         | 60.84        | 2.00E-68  | HYPSUDRAFT_131028  | 70           | 2.00E-83  |
| CC1G_04210 | Nonribosomal peptide synthase                          | SRUG_03252         | 44.8         | 0         | HYPSUDRAFT_63026   | 61.06        | 0         |
| CC1G_04211 | Lysine/ornithine N-monooxygenase                       | SRUG_03253         | 57.27        | 0         | HYPSUDRAFT_51897   | 69.51        | 0         |
| CC1G_10829 | /                                                      | SRUG_03254         | 42.55        | 3.00E-75  | HYPSUDRAFT_63024   | 46.26        | 3.00E-130 |
| CC1G_04212 | Ribosome biogenesis protein RLP24                      | SRUG_03255         | 83.24        | 3.00E-107 | HYPSUDRAFT_179299  | 89.89        | 3.00E-11  |
| CC1G_04213 | Autophagy-related protein 2                            | SRUG_03256         | 46.39        | 0         | HYPSUDRAFT_63022   | 60.68        | 0.00E+00  |
| CC1G_04214 | SGNH_hydrolase/acetylsterase                           | -                  | -            | -         | HYPSUDRAFT_35643   | -            | -         |
| CC1G_13904 | Replication factor A protein 2                         | SRUG_03465         | 33.78        | 1.00E-16  | HYPSUDRAFT_35641   | 34.84        | 3.00E-18  |
| CC1G_13905 | Replication factor A protein 2                         | SRUG_03477         | 53.82        | 2.00E-93  | HYPSUDRAFT_35641   | 80.74        | 8.00E-150 |
| CC1G_04216 | N-acetyltransferase                                    | SRUG_03478         | 58.17        | 0         | HYPSUDRAFT_35639   | 78.74        | 0         |

| Gene ID    | Proposed protein function                                    | Homologous Gene ID | Identity (%) | E-value   | Homologous Gene ID | Identity (%) | E-value   |
|------------|--------------------------------------------------------------|--------------------|--------------|-----------|--------------------|--------------|-----------|
| CC1G_14430 | ABC protein                                                  | SRUG_04292         | 54.32        | 0         | HYPsudRAFT_36540   | 78.77        | 0         |
| CC1G_13741 | Methylcrotonoyl-CoA carboxylase subunit alpha, mitochondrial | SRUG_02401         | 72.86        | 0         | HYPsudRAFT_82913   | 80.69        | 0         |
| CC1G_07067 | Ferric iron reductase FhuF-like transporter                  | SRUG_02402         | 60.14        | 0         | HYPsudRAFT_132979  | 73.69        | 0         |
| CC1G_07068 | Ferric iron reductase FhuF-like transporter                  | SRUG_04293         | 48.43        | 2.00E-158 | HYPsudRAFT_36546   | 73.06        | 0         |
| CC1G_07069 | /                                                            | SRUG_04294         | 31.97        | 1.00E-70  | HYPsudRAFT_159226  | 48.17        | 2.00E-146 |

**Table S18 P450 genes involved in xenobiotic metabolism in *Stropharia rugosoannulata***

| query      | subject                                      | identify | evalue    | Nelson's P450 Name | identity | Blast e value | Putative functions    |
|------------|----------------------------------------------|----------|-----------|--------------------|----------|---------------|-----------------------|
| SRUG_00066 | estExt_Genewise1.C_500019                    | 82.794   | 0         | CYP5068B1          | 22.80%   | 6.00E-26      | Xenobiotic metabolism |
| SRUG_00694 | estExt_Genewise1Plus.C_550131                | 76.425   | 0         | CYP532A3           | 82.55%   | 0             | Xenobiotic metabolism |
| SRUG_00967 | fgenes1_pm.6_#_128                           | 83.818   | 0         | CYP530A5c          | 49.33%   | 1.00E-32      | Xenobiotic metabolism |
| SRUG_01555 | EEB90551.1                                   | 61.983   | 3.90E-58  | CYP620H1           | 61.42%   | 0             | Xenobiotic metabolism |
| SRUG_01356 | estExt_Genewise1Plus.C_1250038               | 78.968   | 0         | CYP5080B3b         | 100.00%  | 0             | Xenobiotic metabolism |
| SRUG_03658 | fgenes1_kg.5_#_482_#_Locus1473v6rpm0.35_PRE  | 55.738   | 0         | CYP584E2b          | 38.74%   | 3.00E-99      | Xenobiotic metabolism |
| SRUG_03479 | HCB03452.1                                   | 44.14    | 0         | CYP620B1           | 24.74%   | 5.00E-34      | Xenobiotic metabolism |
| SRUG_03956 | fgenes1_kg.109_#_10_#_Locus6691v4rpm0.14_PRE | 69.579   | 2.60E-164 | CYP532A6           | 49.18%   | 1.00E-140     | Xenobiotic metabolism |
| SRUG_04349 | e_gw1.165.1.1                                | 83.217   | 0         | CYP58D3ab          | 100.00%  | 1.00E-107     | Xenobiotic metabolism |
| SRUG_04713 | fgenes1_kg.23_#_203_#_Locus4066v1rpm29.98    | 45.924   | 3.43E-153 | CYP677A1           | 47.88%   | 1.00E-128     | Xenobiotic metabolism |
| SRUG_05741 | fgenes1_pm.41_#_21                           | 44.751   | 1.23E-40  | CYP5068A2          | 26.18%   | 5.00E-38      | Xenobiotic metabolism |
| SRUG_05169 | estExt_fgenes2_pg.C_10473                    | 68.973   | 0         | CYP504A7b          | 77.19%   | 0             | Xenobiotic metabolism |
| SRUG_05987 | e_gw1.28.62.1                                | 83.902   | 0         | CYP5080E1          | 44.58%   | 1.00E-105     | Xenobiotic metabolism |
| SRUG_05824 | estExt_Genewise1.C_500019                    | 75.693   | 0         | CYP5068B1          | 22.80%   | 6.00E-26      | Xenobiotic metabolism |
| SRUG_06771 | e_gw1.38.206.1                               | 70.69    | 0         | CYP53A8            | 84.60%   | 0             | Xenobiotic metabolism |
| SRUG_06857 | fgenes1_kg.90_#_5_#_Locus1314v1rpm98.06      | 69.929   | 0         | CYP613B1c          | 99.61%   | 0             | Xenobiotic metabolism |
| SRUG_07533 | fgenes1_kg.22_#_26_#_Locus5560v1rpm19.37     | 62.548   | 0         | CYP528A2           | 60.42%   | 1.00E-175     | Xenobiotic metabolism |
| SRUG_07107 | fgenes1_kg.63_#_84_#_Locus2072v1rpm61.91     | 73.823   | 0         | CYP5078A4b         | 39.79%   | 6.00E-97      | Xenobiotic metabolism |
| SRUG_08041 | fgenes1_kg.108_#_14_#_Locus442v2rpm9.80_PRE  | 67.203   | 0         | CYP530A1           | 89.46%   | 0             | Xenobiotic metabolism |
| SRUG_09114 | fgenes1_kg.30_#_12_#_Locus7990v1rpm8.36      | 61.155   | 0         | CYP677A1           | 47.88%   | 1.00E-128     | Xenobiotic metabolism |
| SRUG_09308 | estExt_Genewise1.C_240063                    | 60.179   | 0         | CYP584E3b          | 27.06%   | 6.00E-34      | Xenobiotic metabolism |
| SRUG_10249 | CC1G_09160                                   | 51.83    | 0         | CYP5068A1c         | 99.60%   | 0             | Xenobiotic metabolism |
| SRUG_10264 | MIX12671_3244_34                             | 55.198   | 0         | CYP53A7            | 31.34%   | 3.00E-24      | Xenobiotic metabolism |
| SRUG_10626 | fgenes1_kg.153_#_19_#_Locus26056v3rpm0.15    | 82.927   | 0         | CYP532A6           | 35.46%   | 6.00E-79      | Xenobiotic metabolism |

|            |                                            |        |   |          |        |           |                       |
|------------|--------------------------------------------|--------|---|----------|--------|-----------|-----------------------|
| SRUG_11224 | fgenes1_kg.23_#_203_#_Locus4066v1rpkm29.98 | 57.611 | 0 | CYP677A1 | 47.88% | 1.00E-128 | Xenobiotic metabolism |
| SRUG_11583 | MIX12671_3244_34                           | 62.955 | 0 | CYP53A7  | 31.34% | 3.00E-24  | Xenobiotic metabolism |

---
